# Supplementary material for: Complete Mitogenomes of Polypedates Tree Frogs Unveil Gene Rearrangement and Concerted Evolution within Rhacophoridae
Source: MDPI journal article supplement (doi:10.3390/ani12182449), 2022-09-16
Supplement: s1 [file s1]

**Table S5.** Mitogenome start and stop codon usage of nine rhacophorids.

| PCGs         | Start Codon |     |     |     |     |     |     |     |     | Stop Codon |       |       |       |       |       |       |       |       |
|--------------|-------------|-----|-----|-----|-----|-----|-----|-----|-----|------------|-------|-------|-------|-------|-------|-------|-------|-------|
|              | A           | B   | C   | D   | E   | F   | G   | H   | I   | A          | B     | C     | D     | E     | F     | G     | H     | I     |
| <i>ATP6</i>  | ATA         | ATA | ATA | ATA | ATT | ATG | ATA | ATG | ATG | T(AA)      | T(AA) | T(AA) | T(AA) | T(AA) | T(AA) | AGG   | TA(A) | T(AA) |
| <i>ATP8</i>  | N/A         | N/A | N/A | N/A | ATG | ATG | ATG | ATG | ATG | N/A        | N/A   | N/A   | N/A   | TAA   | TAA   | TAA   | TAA   | TAA   |
| <i>COI</i>   | ATA         | ATA | ATA | ATA | ATA | ATA | GTG | ATA | ATA | AGG        | AGG   | AGG   | AGG   | AGG   | AGG   | AGG   | AGG   | AGG   |
| <i>COII</i>  | ATA         | ATG | ATA | ATG | ATG | ATG | ATG | ATG | ATG | TAA        | TAA   | TAA   | TAA   | TAA   | TAA   | TAG   | TAA   | AGA   |
| <i>COIII</i> | ATG         | ATG | ATG | ATG | ATG | ATG | ATA | ATG | ATG | T(AA)      | T(AA) | T(AA) | T(AA) | T(AA) | T(AA) | T(AA) | TA(A) | T(AA) |
| <i>CYTB</i>  | ATG         | ATG | ATG | ATG | ATG | ATG | ATG | ATG | ATG | T(AA)      | T(AA) | T(AA) | T(AA) | TAG   | TAA   | TAA   | AGA   | TAA   |
| <i>ND1</i>   | ATG         | ATG | ATG | ATG | GTG | ATA | ATG | ATG | ATT | T(AA)      | T(AA) | T(AA) | T(AA) | T(AA) | T(AA) | T(AA) | T(AA) | T(AA) |
| <i>ND2</i>   | ATT         | ATT | ATT | ATT | GTG | ATT | ATT | ATG | ATT | TAG        | TAG   | T(AA) | T(AA) | TAA   | TAG   | TAA   | TAA   | TAG   |
| <i>ND3</i>   | ATG         | ATG | ATG | ATG | ATA | ATG | ATG | ATG | ATA | T(AA)      | T(AA) | T(AA) | T(AA) | T(AA) | T(AA) | T(AA) | T(AA) | T(AA) |
| <i>ND4</i>   | GTG         | ATG | GTG | ATG | ATG | ATG | ATG | ATG | ATG | T(AA)      | T(AA) | T(AA) | T(AA) | T(AA) | T(AA) | T(AA) | T(AA) | T(AA) |
| <i>ND4L</i>  | ATG         | ATG | ATG | ATG | ATG | ATG | ATG | ATG | ATG | TAA        | TAA   | TAA   | TAA   | TAG   | TAA   | TAA   | TAG   | TAA   |
| <i>ND5</i>   | ATG         | ATG | ATG | ATG | ATG | ATG | ATA | ATG | ATG | TAA        | TAA   | TAA   | TAG   | TAG   | TAA   | TAA   | AGA   | AGA   |
| <i>ND6</i>   | ATG         | ATG | ATG | ATG | ATG | ATG | ATG | ATG | ATG | AGG        | AGG   | AGG   | AGG   | AGA   | AGG   | AGA   | AGA   | AGG   |

A: *Polypedates impresus* (this study); B: *Polypedates mutus* (this study); C: *Polypedates megacephalus*; D: *Polypedates braueri*; E: *Zhangixalus schlegelii*; F: *Zhangixalus dennysi*; G: *Zhangixalus omeimontis*; H: *Zhangixalus arboreus*; I: *Buergeria buergeri*.
