# Supplementary material for: Complete Mitogenomes of Polypedates Tree Frogs Unveil Gene Rearrangement and Concerted Evolution within Rhacophoridae
Source: MDPI journal article supplement (doi:10.3390/ani12182449), 2022-09-16
Supplement: s1 [file s1]

**Table S1.** List of species used in the phylogenetic analyses.

| No. | Class    | Order           | Family               | Genus                    | Species                             | GenBank ID  |
|-----|----------|-----------------|----------------------|--------------------------|-------------------------------------|-------------|
| 1   | Aves     | Sphenisciformes | Spheniscidae         | <i>Aptenodytes</i>       | <i>Aptenodytes forsteri</i>         | KT159230.1  |
| 2   | Aves     | Sphenisciformes | Spheniscidae         | <i>Aptenodytes</i>       | <i>Aptenodytes patagonicus</i>      | MK801135.1  |
| 3   | Reptilia | Crocodylia      | Alligatoridae        | <i>Alligator</i>         | <i>Alligator sinensis</i>           | AF511507.1  |
| 4   | Reptilia | Crocodylia      | Alligatoridae        | <i>Alligator</i>         | <i>Alligator mississippiensis</i>   | Y13113.1    |
| 5   | Amphibia | Anura           | Alytidae             | <i>Alytes</i>            | <i>Alytes obstetricans pertinax</i> | NC_006688.1 |
| 6   | Amphibia | Anura           | Alytidae             | <i>Discoglossus</i>      | <i>Discoglossus galganoi</i>        | NC_006690.1 |
| 7   | Amphibia | Anura           | Arthroleptidae       | <i>Trichobatrachus</i>   | <i>Trichobatrachus robustus</i>     | NC_023382.1 |
| 8   | Amphibia | Anura           | Bombinatoridae       | <i>Bombina</i>           | <i>Bombina bombina</i>              | NC_042501.1 |
| 9   | Amphibia | Anura           | Bombinatoridae       | <i>Bombina</i>           | <i>Bombina fortinuptialis</i>       | NC_006402.1 |
| 10  | Amphibia | Anura           | Bombinatoridae       | <i>Bombina</i>           | <i>Bombina lichuanensis</i>         | NC_021477.1 |
| 11  | Amphibia | Anura           | Bombinatoridae       | <i>Bombina</i>           | <i>Bombina maxima</i>               | NC_011049.1 |
| 12  | Amphibia | Anura           | Bombinatoridae       | <i>Bombina</i>           | <i>Bombina microdeladigitora</i>    | NC_021476.1 |
| 13  | Amphibia | Anura           | Bombinatoridae       | <i>Bombina</i>           | <i>Bombina orientalis</i>           | NC_006689.1 |
| 14  | Amphibia | Anura           | Bombinatoridae       | <i>Bombina</i>           | <i>Bombina variegata</i>            | NC_009258.1 |
| 15  | Amphibia | Anura           | Brevicipitidae       | <i>Breviceps</i>         | <i>Breviceps adspersus</i>          | NC_023379.1 |
| 16  | Amphibia | Anura           | Bufonidae            | <i>Anaxyrus</i>          | <i>Anaxyrus americanus</i>          | NC_047224.1 |
| 17  | Amphibia | Anura           | Bufonidae            | <i>Bufo</i>              | <i>Bufo gargarizans</i>             | NC_008410.1 |
| 18  | Amphibia | Anura           | Bufonidae            | <i>Bufo</i>              | <i>Bufo japonicus</i>               | NC_009886.1 |
| 19  | Amphibia | Anura           | Bufonidae            | <i>Bufo</i>              | <i>Bufo stejnegeri</i>              | NC_027686.1 |
| 20  | Amphibia | Anura           | Bufonidae            | <i>Bufo</i>              | <i>Bufo tibetanus</i>               | NC_020048.1 |
| 21  | Amphibia | Anura           | Bufonidae            | <i>Bufotes</i>           | <i>Bufotes pewzowi</i>              | NC_047225.1 |
| 22  | Amphibia | Anura           | Bufonidae            | <i>Bufotes</i>           | <i>Bufotes pseudoraddei</i>         | NC_046047.1 |
| 23  | Amphibia | Anura           | Bufonidae            | <i>Bufotes</i>           | <i>Bufotes sitibundus</i>           | NC_050665.1 |
| 24  | Amphibia | Anura           | Bufonidae            | <i>Duttaphrynus</i>      | <i>Duttaphrynus melanostictus</i>   | NC_005794.2 |
| 25  | Amphibia | Anura           | Bufonidae            | <i>Melanophryniscus</i>  | <i>Melanophryniscus moreirae</i>    | NC_037378.1 |
| 26  | Amphibia | Anura           | Bufonidae            | <i>Strauchbufo</i>       | <i>Strauchbufo raddei</i>           | NC_028424.1 |
| 27  | Amphibia | Anura           | Calyptocephalellidae | <i>Calyptocephalella</i> | <i>Calyptocephalella gayi</i>       | NC_019997.1 |
| 28  | Amphibia | Anura           | Calyptocephalellidae | <i>Telmatobufo</i>       | <i>Telmatobufo australis</i>        | NC_027274.1 |
| 29  | Amphibia | Anura           | Ceratobatrachidae    | <i>Cornufer</i>          | <i>Cornufer vitianus</i>            | NC_027671.1 |
| 30  | Amphibia | Anura           | Ceratophryidae       | <i>Telmatobius</i>       | <i>Telmatobius bolivianus</i>       | NC_020002.1 |
| 31  | Amphibia | Anura           | Ceratophryidae       | <i>Telmatobius</i>       | <i>Telmatobius chusmisensis</i>     | NC_030333.1 |
| 32  | Amphibia | Anura           | Dendrobatidae        | <i>Anomaloglossus</i>    | <i>Anomaloglossus baebatrachus</i>  | NC_030054.1 |
| 33  | Amphibia | Anura           | Dendrobatidae        | <i>Anomaloglossus</i>    | <i>Anomaloglossus blanci</i>        | NC_037857.1 |
| 34  | Amphibia | Anura           | Dendrobatidae        | <i>Anomaloglossus</i>    | <i>Anomaloglossus degranvillei</i>  | NC_037856.1 |
| 35  | Amphibia | Anura           | Dendrobatidae        | <i>Anomaloglossus</i>    | <i>Anomaloglossus dewynteri</i>     | NC_037855.1 |
| 36  | Amphibia | Anura           | Dendrobatidae        | <i>Anomaloglossus</i>    | <i>Anomaloglossus surinamensis</i>  | NC_037854.1 |
| 37  | Amphibia | Anura           | Dendrobatidae        | <i>Hyloxalus</i>         | <i>Hyloxalus subpunctatus</i>       | NC_037379.1 |
| 38  | Amphibia | Anura           | Dendrobatidae        | <i>Phyllobates</i>       | <i>Phyllobates terribilis</i>       | NC_037380.1 |
| 39  | Amphibia | Anura           | Dicroglossidae       | <i>Euphyctis</i>         | <i>Euphyctis hexadactylus</i>       | NC_014584.1 |
| 40  | Amphibia | Anura           | Dicroglossidae       | <i>Fejervarya</i>        | <i>Fejervarya cancrivora</i>        | NC_012647.1 |
| 41  | Amphibia | Anura           | Dicroglossidae       | <i>Fejervarya</i>        | <i>Fejervarya limnocharis</i>       | NC_005055.1 |
| 42  | Amphibia | Anura           | Dicroglossidae       | <i>Fejervarya</i>        | <i>Fejervarya multistriata</i>      | NC_029754.1 |
| 43  | Amphibia | Anura           | Dicroglossidae       | <i>Hoplobatrachus</i>    | <i>Hoplobatrachus rugulosus</i>     | NC_019615.1 |
| 44  | Amphibia | Anura           | Dicroglossidae       | <i>Hoplobatrachus</i>    | <i>Hoplobatrachus tigerinus</i>     | NC_014581.1 |
| 45  | Amphibia | Anura           | Dicroglossidae       | <i>Limnonectes</i>       | <i>Limnonectes fujianensis</i>      | NC_007440.2 |
| 46  | Amphibia | Anura           | Dicroglossidae       | <i>Nanorana</i>          | <i>Nanorana parkeri</i>             | NC_026789.1 |
| 47  | Amphibia | Anura           | Dicroglossidae       | <i>Nanorana</i>          | <i>Nanorana pleskei</i>             | NC_016119.1 |
| 48  | Amphibia | Anura           | Dicroglossidae       | <i>Nanorana</i>          | <i>Nanorana taihangnica</i>         | NC_024272.1 |
| 49  | Amphibia | Anura           | Dicroglossidae       | <i>Nanorana</i>          | <i>Nanorana ventripunctata</i>      | NC_039094.1 |
| 50  | Amphibia | Anura           | Dicroglossidae       | <i>Occidozyga</i>        | <i>Occidozyga martensii</i>         | NC_014685.1 |
| 51  | Amphibia | Anura           | Dicroglossidae       | <i>Quasipaa</i>          | <i>Quasipaa boulengeri</i>          | NC_021937.1 |
| 52  | Amphibia | Anura           | Dicroglossidae       | <i>Quasipaa</i>          | <i>Quasipaa spinosa</i>             | NC_013270.1 |
| 53  | Amphibia | Anura           | Dicroglossidae       | <i>Quasipaa</i>          | <i>Quasipaa yei</i>                 | NC_024843.1 |
| 54  | Amphibia | Anura           | Heleophrynidae       | <i>Heleophryne</i>       | <i>Heleophryne regis</i>            | NC_019998.1 |
| 55  | Amphibia | Anura           | Hemisotidae          | <i>Hemisus</i>           | <i>Hemisus marmoratus</i>           | NC_023380.1 |
| 56  | Amphibia | Anura           | Hylidae              | <i>Bokermannohyla</i>    | <i>Bokermannohyla alvarengai</i>    | NC_036493.1 |
| 57  | Amphibia | Anura           | Hylidae              | <i>Dryophytes</i>        | <i>Dryophytes japonicus</i>         | NC_010232.1 |
| 58  | Amphibia | Anura           | Hylidae              | <i>Dryophytes</i>        | <i>Dryophytes suweonensis</i>       | NC_032380.1 |
| 59  | Amphibia | Anura           | Hylidae              | <i>Dryophytes</i>        | <i>Dryophytes versicolor</i>        | NC_045917.1 |
| 60  | Amphibia | Anura           | Hylidae              | <i>Hyla</i>              | <i>Hyla annectans</i>               | NC_025309.1 |

Table S1. Cont.

| No. | Class    | Order | Family          | Genus                    | Species                                | GenBank ID  |
|-----|----------|-------|-----------------|--------------------------|----------------------------------------|-------------|
| 61  | Amphibia | Anura | Hylidae         | <i>Hyla</i>              | <i>Hyla chinensis</i>                  | NC_006403.1 |
| 62  | Amphibia | Anura | Hylidae         | <i>Hyla</i>              | <i>Hyla tsinlingensis</i>              | NC_026524.1 |
| 63  | Amphibia | Anura | Hylidae         | <i>Hyla</i>              | <i>Hyla ussuriensis</i>                | NC_029410.1 |
| 64  | Amphibia | Anura | Hylidae         | <i>Pseudis</i>           | <i>Pseudis tocantins</i>               | NC_041426.1 |
| 65  | Amphibia | Anura | Hyperoliidae    | <i>Hyperolius</i>        | <i>Hyperolius marmoratus</i>           | NC_023381.1 |
| 66  | Amphibia | Anura | Leiopelmatidae  | <i>Leiopelma</i>         | <i>Leiopelma archeyi</i>               | NC_014691.1 |
| 67  | Amphibia | Anura | Leiopelmatidae  | <i>Leiopelma</i>         | <i>Leiopelma hochstetteri</i>          | NC_027072.1 |
| 68  | Amphibia | Anura | Limnodynastidae | <i>Lechriodus</i>        | <i>Lechriodus melanopyga</i>           | NC_019999.1 |
| 69  | Amphibia | Anura | Mantellidae     | <i>Mantella</i>          | <i>Mantella baroni</i>                 | NC_039758.1 |
| 70  | Amphibia | Anura | Mantellidae     | <i>Mantella</i>          | <i>Mantella madagascariensis</i>       | NC_007888.1 |
| 71  | Amphibia | Anura | Megophryidae    | <i>Leptobranchella</i>   | <i>Leptobranchella oshanensis</i>      | NC_020610.1 |
| 72  | Amphibia | Anura | Megophryidae    | <i>Leptobranchium</i>    | <i>Leptobranchium boringii</i>         | NC_024427.1 |
| 73  | Amphibia | Anura | Megophryidae    | <i>Leptobranchium</i>    | <i>Leptobranchium leishanense</i>      | NC_031411.1 |
| 74  | Amphibia | Anura | Megophryidae    | <i>Megophrys</i>         | <i>Megophrys shapingsensis</i>         | NC_018785.1 |
| 75  | Amphibia | Anura | Megophryidae    | <i>Oreolalax</i>         | <i>Oreolalax lichuanensis</i>          | NC_030627.1 |
| 76  | Amphibia | Anura | Megophryidae    | <i>Oreolalax</i>         | <i>Oreolalax major</i>                 | NC_030605.1 |
| 77  | Amphibia | Anura | Megophryidae    | <i>Oreolalax</i>         | <i>Oreolalax multipunctatus</i>        | NC_037382.1 |
| 78  | Amphibia | Anura | Megophryidae    | <i>Oreolalax</i>         | <i>Oreolalax omeimontis</i>            | NC_049862.1 |
| 79  | Amphibia | Anura | Megophryidae    | <i>Scutiger</i>          | <i>Scutiger ningshanensis</i>          | NC_031426.1 |
| 80  | Amphibia | Anura | Microhylidae    | <i>Kaloula</i>           | <i>Kaloula borealis</i>                | NC_020044.1 |
| 81  | Amphibia | Anura | Microhylidae    | <i>Kaloula</i>           | <i>Kaloula pulchra</i>                 | NC_006405.1 |
| 82  | Amphibia | Anura | Microhylidae    | <i>Kaloula</i>           | <i>Kaloula rugifera</i>                | NC_029409.1 |
| 83  | Amphibia | Anura | Microhylidae    | <i>Kaloula</i>           | <i>Kaloula verrucosa</i>               | NC_039411.1 |
| 84  | Amphibia | Anura | Microhylidae    | <i>Microhyla</i>         | <i>Microhyla butleri</i>               | NC_030049.1 |
| 85  | Amphibia | Anura | Microhylidae    | <i>Microhyla</i>         | <i>Microhyla fissipes</i>              | NC_045110.1 |
| 86  | Amphibia | Anura | Microhylidae    | <i>Microhyla</i>         | <i>Microhyla heymonsi</i>              | NC_006406.1 |
| 87  | Amphibia | Anura | Microhylidae    | <i>Microhyla</i>         | <i>Microhyla mixtura</i>               | NC_038130.1 |
| 88  | Amphibia | Anura | Microhylidae    | <i>Microhyla</i>         | <i>Microhyla okinavensis</i>           | NC_010233.1 |
| 89  | Amphibia | Anura | Microhylidae    | <i>Microhyla</i>         | <i>Microhyla ornata</i>                | NC_009422.1 |
| 90  | Amphibia | Anura | Microhylidae    | <i>Microhyla</i>         | <i>Microhyla pulchra</i>               | NC_024547.1 |
| 91  | Amphibia | Anura | Microhylidae    | <i>Microhyla</i>         | <i>Microhyla taraiensis</i>            | NC_039176.1 |
| 92  | Amphibia | Anura | Pelobatidae     | <i>Pelobates</i>         | <i>Pelobates cultripes</i>             | NC_008144.1 |
| 93  | Amphibia | Anura | Pelobatidae     | <i>Pelobates</i>         | <i>Pelobates fuscus</i>                | NC_051953.1 |
| 94  | Amphibia | Anura | Pelodytidae     | <i>Pelodytes</i>         | <i>Pelodytes cf. punctatus II-2011</i> | NC_020000.1 |
| 95  | Amphibia | Anura | Pipidae         | <i>Hymenochirus</i>      | <i>Hymenochirus boettgeri</i>          | NC_015615.1 |
| 96  | Amphibia | Anura | Pipidae         | <i>Pipa</i>              | <i>Pipa carvalhoi</i>                  | NC_015617.1 |
| 97  | Amphibia | Anura | Pipidae         | <i>Pseudhymenochirus</i> | <i>Pseudhymenochirus merlini</i>       | NC_015618.1 |
| 98  | Amphibia | Anura | Pipidae         | <i>Xenopus</i>           | <i>Xenopus allofraseri</i>             | NC_044874.1 |
| 99  | Amphibia | Anura | Pipidae         | <i>Xenopus</i>           | <i>Xenopus amieti</i>                  | NC_044876.1 |
| 100 | Amphibia | Anura | Pipidae         | <i>Xenopus</i>           | <i>Xenopus andreii</i>                 | NC_044878.1 |
| 101 | Amphibia | Anura | Pipidae         | <i>Xenopus</i>           | <i>Xenopus borealis</i>                | NC_018776.1 |
| 102 | Amphibia | Anura | Pipidae         | <i>Xenopus</i>           | <i>Xenopus boumbaensis</i>             | NC_044877.1 |
| 103 | Amphibia | Anura | Pipidae         | <i>Xenopus</i>           | <i>Xenopus calcaratus</i>              | NC_044865.1 |
| 104 | Amphibia | Anura | Pipidae         | <i>Xenopus</i>           | <i>Xenopus clivii</i>                  | NC_044886.1 |
| 105 | Amphibia | Anura | Pipidae         | <i>Xenopus</i>           | <i>Xenopus epitropicalis</i>           | NC_044867.1 |
| 106 | Amphibia | Anura | Pipidae         | <i>Xenopus</i>           | <i>Xenopus eysoole</i>                 | NC_044884.1 |
| 107 | Amphibia | Anura | Pipidae         | <i>Xenopus</i>           | <i>Xenopus fischbergi</i>              | NC_044888.1 |
| 108 | Amphibia | Anura | Pipidae         | <i>Xenopus</i>           | <i>Xenopus gilli</i>                   | NC_044871.1 |
| 109 | Amphibia | Anura | Pipidae         | <i>Xenopus</i>           | <i>Xenopus itombwensis</i>             | NC_044879.1 |
| 110 | Amphibia | Anura | Pipidae         | <i>Xenopus</i>           | <i>Xenopus kobeli</i>                  | NC_044883.1 |
| 111 | Amphibia | Anura | Pipidae         | <i>Xenopus</i>           | <i>Xenopus laevis</i>                  | NC_001573.1 |
| 112 | Amphibia | Anura | Pipidae         | <i>Xenopus</i>           | <i>Xenopus largeni</i>                 | NC_044868.1 |
| 113 | Amphibia | Anura | Pipidae         | <i>Xenopus</i>           | <i>Xenopus lenduensis</i>              | NC_044880.1 |
| 114 | Amphibia | Anura | Pipidae         | <i>Xenopus</i>           | <i>Xenopus longipes</i>                | NC_044885.1 |
| 115 | Amphibia | Anura | Pipidae         | <i>Xenopus</i>           | <i>Xenopus mellotropicalis</i>         | NC_044866.1 |
| 116 | Amphibia | Anura | Pipidae         | <i>Xenopus</i>           | <i>Xenopus muelleri</i>                | NC_044887.1 |
| 117 | Amphibia | Anura | Pipidae         | <i>Xenopus</i>           | <i>Xenopus parafraseri</i>             | NC_044872.1 |
| 118 | Amphibia | Anura | Pipidae         | <i>Xenopus</i>           | <i>Xenopus petersii</i>                | NC_044869.1 |
| 119 | Amphibia | Anura | Pipidae         | <i>Xenopus</i>           | <i>Xenopus poweri</i>                  | NC_044870.1 |
| 120 | Amphibia | Anura | Pipidae         | <i>Xenopus</i>           | <i>Xenopus pygmaeus</i>                | NC_044873.1 |

Table S1. Cont.

| No. | Class           | Order        | Family               | Genus               | Species                                   | GenBank ID        |
|-----|-----------------|--------------|----------------------|---------------------|-------------------------------------------|-------------------|
| 121 | Amphibia        | Anura        | Pipidae              | <i>Xenopus</i>      | <i>Xenopus ruwenzoriensis</i>             | NC_044882.1       |
| 122 | Amphibia        | Anura        | Pipidae              | <i>Xenopus</i>      | <i>Xenopus tropicalis</i>                 | NC_006839.1       |
| 123 | Amphibia        | Anura        | Pipidae              | <i>Xenopus</i>      | <i>Xenopus vestitus</i>                   | NC_044881.1       |
| 124 | Amphibia        | Anura        | Pipidae              | <i>Xenopus</i>      | <i>Xenopus victorianus</i>                | NC_018775.1       |
| 125 | Amphibia        | Anura        | Pipidae              | <i>Xenopus</i>      | <i>Xenopus wittei</i>                     | NC_044875.1       |
| 126 | Amphibia        | Anura        | Pyxicephalidae       | <i>Pyxicephalus</i> | <i>Pyxicephalus adspersus</i>             | NC_044480.1       |
| 127 | Amphibia        | Anura        | Ranidae              | <i>Amolops</i>      | <i>Amolops granulosis</i>                 | NC_044901.1       |
| 128 | Amphibia        | Anura        | Ranidae              | <i>Amolops</i>      | <i>Amolops loloensis</i>                  | NC_029250.1       |
| 129 | Amphibia        | Anura        | Ranidae              | <i>Amolops</i>      | <i>Amolops mantzorum</i>                  | NC_024180.1       |
| 130 | Amphibia        | Anura        | Ranidae              | <i>Amolops</i>      | <i>Amolops ricketti</i>                   | NC_023949.1       |
| 131 | Amphibia        | Anura        | Ranidae              | <i>Amolops</i>      | <i>Amolops wuyiensis</i>                  | NC_025591.1       |
| 132 | Amphibia        | Anura        | Ranidae              | <i>Babina</i>       | <i>Babina adenopleura</i>                 | NC_018771.1       |
| 133 | Amphibia        | Anura        | Ranidae              | <i>Babina</i>       | <i>Babina holsti</i>                      | NC_022870.1       |
| 134 | Amphibia        | Anura        | Ranidae              | <i>Babina</i>       | <i>Babina subaspera</i>                   | NC_022871.1       |
| 135 | Amphibia        | Anura        | Ranidae              | <i>Glandirana</i>   | <i>Glandirana emeljanovi</i>              | NC_030211.1       |
| 136 | Amphibia        | Anura        | Ranidae              | <i>Glandirana</i>   | <i>Glandirana tientaiensis</i>            | NC_025226.1       |
| 137 | Amphibia        | Anura        | Ranidae              | <i>Lithobates</i>   | <i>Lithobates catesbeianus</i>            | NC_022696.1       |
| 138 | Amphibia        | Anura        | Ranidae              | <i>Lithobates</i>   | <i>Lithobates okaloosae</i>               | NC_028283.1       |
| 139 | Amphibia        | Anura        | Ranidae              | <i>Lithobates</i>   | <i>Lithobates sylvaticus</i>              | NC_027236.1       |
| 140 | Amphibia        | Anura        | Ranidae              | <i>Nidirana</i>     | <i>Nidirana okinavana</i>                 | NC_022872.1       |
| 141 | Amphibia        | Anura        | Ranidae              | <i>Odorrana</i>     | <i>Odorrana graminea</i>                  | NC_050884.1       |
| 142 | Amphibia        | Anura        | Ranidae              | <i>Odorrana</i>     | <i>Odorrana hainanensis</i>               | NC_034984.1       |
| 143 | Amphibia        | Anura        | Ranidae              | <i>Odorrana</i>     | <i>Odorrana ishikawae</i>                 | NC_015305.1       |
| 144 | Amphibia        | Anura        | Ranidae              | <i>Odorrana</i>     | <i>Odorrana livida</i>                    | NC_043768.1       |
| 145 | Amphibia        | Anura        | Ranidae              | <i>Odorrana</i>     | <i>Odorrana margaretae</i>                | NC_024603.1       |
| 146 | Amphibia        | Anura        | Ranidae              | <i>Odorrana</i>     | <i>Odorrana schmackeri</i>                | NC_027827.1       |
| 147 | Amphibia        | Anura        | Ranidae              | <i>Odorrana</i>     | <i>Odorrana tormota</i>                   | NC_009423.1       |
| 148 | Amphibia        | Anura        | Ranidae              | <i>Odorrana</i>     | <i>Odorrana wuchuanensis</i>              | NC_034983.1       |
| 149 | Amphibia        | Anura        | Ranidae              | <i>Pelophylax</i>   | <i>Pelophylax bedriagae</i>               | NC_029200.1       |
| 150 | Amphibia        | Anura        | Ranidae              | <i>Pelophylax</i>   | <i>Pelophylax cf. bedriagae</i> AFL1      | NC_029196.1       |
| 151 | Amphibia        | Anura        | Ranidae              | <i>Pelophylax</i>   | <i>Pelophylax cf. bedriagae</i> GM178     | NC_029201.1       |
| 152 | Amphibia        | Anura        | Ranidae              | <i>Pelophylax</i>   | <i>Pelophylax cf. bedriagae</i> MPFC1082  | NC_029197.1       |
| 153 | Amphibia        | Anura        | Ranidae              | <i>Pelophylax</i>   | <i>Pelophylax cf. terentievi</i> GM87-239 | NC_029198.1       |
| 154 | Amphibia        | Anura        | Ranidae              | <i>Pelophylax</i>   | <i>Pelophylax cf. terentievi</i> MPFC1736 | NC_029199.1       |
| 155 | Amphibia        | Anura        | Ranidae              | <i>Pelophylax</i>   | <i>Pelophylax chosonicus</i>              | NC_016059.1       |
| 156 | Amphibia        | Anura        | Ranidae              | <i>Pelophylax</i>   | <i>Pelophylax cretensis</i>               | NC_025575.1       |
| 157 | Amphibia        | Anura        | Ranidae              | <i>Pelophylax</i>   | <i>Pelophylax cypriensis</i>              | NC_026893.1       |
| 158 | Amphibia        | Anura        | Ranidae              | <i>Pelophylax</i>   | <i>Pelophylax epeiroticus</i>             | NC_026894.1       |
| 159 | Amphibia        | Anura        | Ranidae              | <i>Pelophylax</i>   | <i>Pelophylax kurtmuelleri</i>            | NC_026895.1       |
| 160 | Amphibia        | Anura        | Ranidae              | <i>Pelophylax</i>   | <i>Pelophylax nigromaculatus</i>          | NC_002805.1       |
| 161 | Amphibia        | Anura        | Ranidae              | <i>Pelophylax</i>   | <i>Pelophylax plancyi</i>                 | NC_009264.1       |
| 162 | Amphibia        | Anura        | Ranidae              | <i>Pelophylax</i>   | <i>Pelophylax shqipericus</i>             | NC_026896.1       |
| 163 | Amphibia        | Anura        | Ranidae              | <i>Rana</i>         | <i>Rana amurensis</i>                     | NC_030042.1       |
| 164 | Amphibia        | Anura        | Ranidae              | <i>Rana</i>         | <i>Rana cf. chensinensis</i> QYCRCH_C     | NC_023529.1       |
| 165 | Amphibia        | Anura        | Ranidae              | <i>Rana</i>         | <i>Rana chaochiaoensis</i>                | NC_035803.1       |
| 166 | Amphibia        | Anura        | Ranidae              | <i>Rana</i>         | <i>Rana draytonii</i>                     | NC_028296.1       |
| 167 | Amphibia        | Anura        | Ranidae              | <i>Rana</i>         | <i>Rana dybowskii</i>                     | NC_023528.1       |
| 168 | Amphibia        | Anura        | Ranidae              | <i>Rana</i>         | <i>Rana huanrensis</i>                    | NC_028521.1       |
| 169 | Amphibia        | Anura        | Ranidae              | <i>Rana</i>         | <i>Rana kukunoris</i>                     | NC_035804.1       |
| 170 | Amphibia        | Anura        | Ranidae              | <i>Rana</i>         | <i>Rana kunyuensis</i>                    | NC_024548.1       |
| 171 | Amphibia        | Anura        | Ranidae              | <i>Rana</i>         | <i>Rana omeimontis</i>                    | NC_035805.1       |
| 172 | Amphibia        | Anura        | Ranidae              | <i>Rana</i>         | <i>Rana temporaria</i>                    | NC_042226.1       |
| 173 | Amphibia        | Anura        | Ranidae              | <i>Sylvirana</i>    | <i>Sylvirana guentheri</i>                | NC_024748.1       |
| 174 | Amphibia        | Anura        | Rhacophoridae        | <i>Buergeria</i>    | <i>Buergeria buergeri</i>                 | NC_008975.1       |
| 175 | Amphibia        | Anura        | Rhacophoridae        | <i>Polypedates</i>  | <i>Polypedates braueri</i>                | NC_042797.1       |
| 176 | Amphibia        | Anura        | Rhacophoridae        | <i>Polypedates</i>  | <i>Polypedates megacephalus</i>           | NC_043955.1       |
| 177 | <b>Amphibia</b> | <b>Anura</b> | <b>Rhacophoridae</b> | <b>Polypedates</b>  | <b>Polypedates impresus (this study)</b>  | <b>MN869008.1</b> |
| 178 | <b>Amphibia</b> | <b>Anura</b> | <b>Rhacophoridae</b> | <b>Polypedates</b>  | <b>Polypedates mutus (this study)</b>     | <b>MN869009.1</b> |
| 179 | Amphibia        | Anura        | Rhacophoridae        | <i>Zhangixalus</i>  | <i>Zhangixalus arboreus</i>               | LC565708.1        |
| 180 | Amphibia        | Anura        | Rhacophoridae        | <i>Zhangixalus</i>  | <i>Zhangixalus dennysi</i>                | NC_027452.1       |

**Table S1.** *Cont.*

| No. | Class    | Order | Family         | Genus               | Species                       | GenBank ID  |
|-----|----------|-------|----------------|---------------------|-------------------------------|-------------|
| 181 | Amphibia | Anura | Rhacophoridae  | <i>Zhangixalus</i>  | <i>Zhangixalus omeimontis</i> | NC_046387.1 |
| 182 | Amphibia | Anura | Rhacophoridae  | <i>Zhangixalus</i>  | <i>Zhangixalus schlegelii</i> | NC_007178.1 |
| 183 | Amphibia | Anura | Rhinophrynidae | <i>Rhinophrynus</i> | <i>Rhinophrynus dorsalis</i>  | NC_015620.1 |
| 184 | Amphibia | Anura | Scaphiopodidae | <i>Scaphiopus</i>   | <i>Scaphiopus holbrookii</i>  | NC_037377.1 |
| 185 | Amphibia | Anura | Sooglossidae   | <i>Sooglossus</i>   | <i>Sooglossus thomasseti</i>  | NC_020001.1 |
