# Supplementary material for: Complete Mitogenomes of Polypedates Tree Frogs Unveil Gene Rearrangement and Concerted Evolution within Rhacophoridae
Source: MDPI journal article supplement (doi:10.3390/ani12182449), 2022-09-16
Supplement: s1 [file s1]

**Table S4.** Mitogenome nucleotide composition and skewness for the whole genome and individual genes of nine rhacophorids.

| Region       | Species | A%   | T(U)% | G%   | C%   | A+T% | G+C% | AT skew | GC skew |
|--------------|---------|------|-------|------|------|------|------|---------|---------|
| Whole-Genome | A       | 30.2 | 30.8  | 14.7 | 24.3 | 61.0 | 39.0 | -0.010  | -0.246  |
|              | B       | 30.5 | 30.4  | 14.5 | 24.6 | 60.9 | 39.1 | 0.002   | -0.258  |
|              | C       | 30.2 | 30.4  | 14.8 | 24.6 | 60.6 | 39.4 | -0.003  | -0.249  |
|              | D       | 29.7 | 31.9  | 15.1 | 23.3 | 61.6 | 38.4 | -0.036  | -0.214  |
|              | E       | 31.8 | 30.3  | 14.7 | 23.3 | 62.1 | 38.0 | 0.024   | -0.226  |
|              | F       | 31.4 | 31.0  | 14.3 | 23.2 | 62.4 | 37.5 | 0.006   | -0.237  |
|              | G       | 32.5 | 30.5  | 13.7 | 23.3 | 63.0 | 37.0 | 0.032   | -0.259  |
|              | H       | 32.9 | 31.6  | 13.3 | 22.2 | 64.5 | 35.5 | 0.020   | -0.251  |
|              | I       | 29.9 | 30.5  | 14.7 | 24.8 | 60.4 | 39.5 | -0.010  | -0.256  |
| 12S rRNA     | A       | 33.0 | 24.2  | 19.6 | 23.2 | 57.2 | 42.8 | 0.154   | -0.084  |
|              | B       | 33.1 | 23.5  | 20.2 | 23.2 | 56.6 | 43.4 | 0.170   | -0.069  |
|              | C       | 32.9 | 24.8  | 19.4 | 22.9 | 57.7 | 42.3 | 0.140   | -0.083  |
|              | D       | 33.0 | 24.0  | 20.5 | 22.6 | 57.0 | 43.1 | 0.158   | -0.049  |
|              | E       | 32.6 | 24.4  | 19.9 | 23.2 | 57.0 | 43.1 | 0.144   | -0.075  |
|              | F       | 33.8 | 24.1  | 19.7 | 22.3 | 57.9 | 42.0 | 0.167   | -0.062  |
|              | G       | 33.6 | 23.2  | 19.3 | 23.9 | 56.8 | 43.2 | 0.183   | -0.105  |
|              | H       | 32.8 | 23.7  | 19.7 | 23.9 | 56.5 | 43.6 | 0.161   | -0.097  |
|              | I       | 32.7 | 23.0  | 20.0 | 24.4 | 55.7 | 44.4 | 0.174   | -0.112  |
| 16S rRNA     | A       | 34.4 | 25.7  | 18.1 | 21.9 | 60.1 | 40.0 | 0.145   | -0.095  |
|              | B       | 35.1 | 26.9  | 17.6 | 20.4 | 62.0 | 38.0 | 0.132   | -0.074  |
|              | C       | 34.6 | 25.6  | 17.7 | 22.2 | 60.2 | 39.9 | 0.150   | -0.113  |
|              | D       | 34.1 | 27.3  | 17.5 | 21.2 | 61.4 | 38.7 | 0.111   | -0.096  |
|              | E       | 36.7 | 24.4  | 17.4 | 21.6 | 61.1 | 39.0 | 0.202   | -0.106  |
|              | F       | 36.7 | 25.6  | 16.8 | 20.9 | 62.3 | 37.7 | 0.178   | -0.109  |
|              | G       | 37.7 | 25.4  | 16.8 | 20.1 | 63.1 | 36.9 | 0.196   | -0.089  |
|              | H       | 37.1 | 24.6  | 17.0 | 21.3 | 61.7 | 38.3 | 0.202   | -0.113  |
|              | I       | 33.5 | 25.8  | 18.0 | 22.7 | 59.3 | 40.7 | 0.131   | -0.116  |
| ND1          | A       | 29.3 | 32.6  | 12.9 | 25.2 | 61.9 | 38.1 | -0.053  | -0.323  |
|              | B       | 29.3 | 32.5  | 12.8 | 25.4 | 61.8 | 38.2 | -0.052  | -0.330  |
|              | C       | 28.7 | 32.3  | 13.0 | 26.0 | 61.0 | 39.0 | -0.059  | -0.333  |
|              | D       | 28.0 | 33.0  | 14.0 | 25.0 | 61.0 | 39.0 | -0.082  | -0.282  |
|              | E       | 29.0 | 32.0  | 13.3 | 25.6 | 61.0 | 38.9 | -0.049  | -0.316  |
|              | F       | 29.4 | 32.5  | 13.1 | 25.0 | 61.9 | 38.1 | -0.049  | -0.311  |
|              | G       | 30.3 | 33.9  | 12.3 | 23.5 | 64.2 | 35.8 | -0.057  | -0.314  |
|              | H       | 30.1 | 32.4  | 12.3 | 25.3 | 62.5 | 37.6 | -0.037  | -0.346  |
|              | I       | 26.2 | 34.1  | 13.1 | 26.6 | 60.3 | 39.7 | -0.131  | -0.342  |

Table S4. Cont.

| Region | Species | A%                                                        | T(U)% | G%   | C%   | A+T% | G+C% | AT skew | GC skew |
|--------|---------|-----------------------------------------------------------|-------|------|------|------|------|---------|---------|
| ND2    | A       | 32.0                                                      | 32.2  | 10.9 | 25.0 | 64.2 | 35.9 | -0.003  | -0.393  |
|        | B       | 31.3                                                      | 31.8  | 10.9 | 26.0 | 63.1 | 36.9 | -0.008  | -0.409  |
|        | C       | 31.7                                                      | 31.4  | 11.2 | 25.7 | 63.1 | 36.9 | 0.005   | -0.394  |
|        | D       | 30.5                                                      | 32.5  | 11.8 | 25.1 | 63.0 | 36.9 | -0.032  | -0.360  |
|        | E       | 32.2                                                      | 28.4  | 12.2 | 27.2 | 60.6 | 39.4 | 0.062   | -0.379  |
|        | F       | 34.8                                                      | 30.0  | 9.9  | 25.3 | 64.8 | 35.2 | 0.074   | -0.437  |
|        | G       | 34.4                                                      | 30.7  | 10.5 | 24.4 | 65.1 | 34.9 | 0.056   | -0.398  |
|        | H       | 33.3                                                      | 30.2  | 11.1 | 25.3 | 63.5 | 36.4 | 0.049   | -0.389  |
|        | I       | 32.4                                                      | 30.1  | 9.8  | 27.7 | 62.5 | 37.5 | 0.037   | -0.477  |
| COI    | A       | 23.6                                                      | 33.1  | 18.4 | 24.8 | 56.7 | 43.2 | -0.168  | -0.148  |
|        | B       | 24.6                                                      | 32.1  | 18.5 | 24.8 | 56.7 | 43.3 | -0.132  | -0.145  |
|        | C       | 23.4                                                      | 32.8  | 18.6 | 25.2 | 56.2 | 43.8 | -0.168  | -0.150  |
|        | D       | 24.0                                                      | 33.3  | 19.0 | 23.6 | 57.3 | 42.6 | -0.162  | -0.108  |
|        | E       | 26.7                                                      | 33.1  | 17.0 | 23.2 | 59.8 | 40.2 | -0.107  | -0.155  |
|        | F       | 26.6                                                      | 33.4  | 16.9 | 23.2 | 60.0 | 40.1 | -0.114  | -0.158  |
|        | G       | 26.5                                                      | 34.9  | 16.8 | 21.8 | 61.4 | 38.6 | -0.137  | -0.130  |
|        | H       | 26.7                                                      | 33.6  | 16.6 | 23.1 | 60.3 | 39.7 | -0.114  | -0.162  |
|        | I       | 24.8                                                      | 32.6  | 17.9 | 24.8 | 57.4 | 42.7 | -0.135  | -0.162  |
| COII   | A       | 30.9                                                      | 29.9  | 15.8 | 23.5 | 60.8 | 39.3 | 0.016   | -0.196  |
|        | B       | 32.3                                                      | 30.6  | 15.1 | 22.0 | 62.9 | 37.1 | 0.027   | -0.186  |
|        | C       | 30.1                                                      | 29.3  | 16.5 | 24.1 | 59.4 | 40.6 | 0.013   | -0.187  |
|        | D       | 31.0                                                      | 28.8  | 17.1 | 23.0 | 59.8 | 40.1 | 0.037   | -0.147  |
|        | E       | 32.3                                                      | 27.9  | 15.6 | 24.1 | 60.2 | 39.7 | 0.073   | -0.213  |
|        | F       | 33.0                                                      | 30.4  | 15.2 | 21.3 | 63.4 | 36.5 | 0.041   | -0.168  |
|        | G       | 32.3                                                      | 31.0  | 15.2 | 21.5 | 63.3 | 36.7 | 0.021   | -0.171  |
|        | H       | 31.9                                                      | 29.4  | 15.8 | 23.0 | 61.3 | 38.8 | 0.041   | -0.185  |
|        | I       | 31.3                                                      | 27.9  | 15.0 | 25.8 | 59.2 | 40.8 | 0.057   | -0.264  |
| ATP8   | A       | ATP8 gene was absent in <i>Polypedates impresus</i> .     |       |      |      |      |      |         |         |
|        | B       | ATP8 gene was absent in <i>Polypedates mutus</i> .        |       |      |      |      |      |         |         |
|        | C       | ATP8 gene was absent in <i>Polypedates megacephalus</i> . |       |      |      |      |      |         |         |
|        | D       | ATP8 gene was absent in <i>Polypedates braueri</i> .      |       |      |      |      |      |         |         |
|        | E       | 33.3                                                      | 29.7  | 9.7  | 27.3 | 63.0 | 37.0 | 0.058   | -0.475  |
|        | F       | 35.8                                                      | 33.9  | 6.7  | 23.6 | 69.7 | 30.3 | 0.026   | -0.56   |
|        | G       | 35.2                                                      | 36.4  | 6.8  | 21.6 | 71.6 | 28.4 | -0.017  | -0.522  |
|        | H       | 37.0                                                      | 32.7  | 7.3  | 23.0 | 69.7 | 30.3 | 0.061   | -0.52   |
|        | I       | 35.8                                                      | 30.3  | 8.5  | 25.5 | 66.1 | 34.0 | 0.083   | -0.512  |

Table S4. *Cont.*

| Region       | Species | A%   | T(U)% | G%   | C%   | A+T% | G+C% | AT skew | GC skew |
|--------------|---------|------|-------|------|------|------|------|---------|---------|
| <i>ATP6</i>  | A       | 27.2 | 35.5  | 11.8 | 25.5 | 62.7 | 37.3 | -0.132  | -0.367  |
|              | B       | 27.5 | 33.4  | 11.8 | 27.2 | 60.9 | 39.0 | -0.097  | -0.395  |
|              | C       | 27.1 | 33.0  | 12.2 | 27.7 | 60.1 | 39.9 | -0.097  | -0.388  |
|              | D       | 26.5 | 36.4  | 12.8 | 24.3 | 62.9 | 37.1 | -0.157  | -0.310  |
|              | E       | 28.3 | 33.1  | 10.9 | 27.7 | 61.4 | 38.6 | -0.079  | -0.433  |
|              | F       | 27.7 | 33.6  | 11.5 | 27.2 | 61.3 | 38.7 | -0.096  | -0.405  |
|              | G       | 29.0 | 34.4  | 10.6 | 26.0 | 63.4 | 36.6 | -0.086  | -0.421  |
|              | H       | 28.0 | 33.7  | 10.7 | 27.7 | 61.7 | 38.4 | -0.093  | -0.443  |
|              | I       | 25.5 | 35.5  | 11.4 | 27.6 | 61.0 | 39.0 | -0.163  | -0.414  |
| <i>COIII</i> | A       | 27.6 | 32.0  | 16.7 | 23.7 | 59.6 | 40.4 | -0.074  | -0.173  |
|              | B       | 25.6 | 30.0  | 18.4 | 26.0 | 55.6 | 44.4 | -0.079  | -0.171  |
|              | C       | 27.2 | 31.1  | 16.8 | 24.9 | 58.3 | 41.7 | -0.067  | -0.194  |
|              | D       | 25.9 | 32.4  | 17.3 | 24.4 | 58.3 | 41.7 | -0.111  | -0.170  |
|              | E       | 27.4 | 32.1  | 16.5 | 24.0 | 59.5 | 40.5 | -0.079  | -0.186  |
|              | F       | 27.6 | 32.4  | 16.6 | 23.5 | 60.0 | 40.1 | -0.081  | -0.172  |
|              | G       | 27.8 | 33.4  | 16.1 | 22.7 | 61.2 | 38.8 | -0.093  | -0.169  |
|              | H       | 27.6 | 31.2  | 16.1 | 25.1 | 58.8 | 41.2 | -0.061  | -0.221  |
|              | I       | 26.0 | 30.0  | 17.2 | 26.8 | 56.0 | 44.0 | -0.071  | -0.217  |
| <i>ND3</i>   | A       | 25.0 | 32.4  | 16.8 | 25.9 | 57.4 | 42.7 | -0.129  | -0.213  |
|              | B       | 21.5 | 32.9  | 18.5 | 27.1 | 54.4 | 45.6 | -0.210  | -0.189  |
|              | C       | 22.6 | 31.8  | 17.9 | 27.6 | 54.4 | 45.5 | -0.169  | -0.212  |
|              | D       | 23.8 | 32.9  | 18.5 | 24.7 | 56.7 | 43.2 | -0.160  | -0.144  |
|              | E       | 25.7 | 35.0  | 15.5 | 23.9 | 60.7 | 39.4 | -0.154  | -0.215  |
|              | F       | 23.8 | 35.0  | 15.6 | 25.6 | 58.8 | 41.2 | -0.191  | -0.243  |
|              | G       | 24.7 | 36.8  | 16.5 | 22.1 | 61.5 | 38.6 | -0.196  | -0.145  |
|              | H       | 25.3 | 34.7  | 15.0 | 25.0 | 60.0 | 40.0 | -0.157  | -0.250  |
|              | I       | 23.9 | 32.1  | 14.0 | 30.0 | 56.0 | 44.0 | -0.146  | -0.364  |
| <i>ND4L</i>  | A       | 22.8 | 35.1  | 16.1 | 26.0 | 57.9 | 42.1 | -0.212  | -0.235  |
|              | B       | 23.9 | 30.9  | 16.8 | 28.4 | 54.8 | 45.2 | -0.128  | -0.257  |
|              | C       | 21.8 | 34.4  | 16.8 | 27.0 | 56.1 | 43.9 | -0.225  | -0.232  |
|              | D       | 26.0 | 31.6  | 14.7 | 27.7 | 57.6 | 42.4 | -0.097  | -0.307  |
|              | E       | 23.2 | 34.0  | 14.4 | 28.4 | 57.2 | 42.8 | -0.191  | -0.328  |
|              | F       | 27.4 | 36.1  | 11.9 | 24.6 | 63.5 | 36.5 | -0.138  | -0.346  |
|              | G       | 25.6 | 34.4  | 11.9 | 28.1 | 60.0 | 40.0 | -0.146  | -0.404  |
|              | H       | 26.7 | 36.5  | 11.2 | 25.6 | 63.2 | 36.8 | -0.156  | -0.392  |
|              | I       | 28.1 | 35.1  | 12.6 | 24.2 | 63.2 | 36.8 | -0.111  | -0.314  |

Table S4. Cont.

| Region | Species | A%   | T(U)% | G%   | C%   | A+T% | G+C% | AT skew | GC skew |
|--------|---------|------|-------|------|------|------|------|---------|---------|
| ND4    | A       | 28.0 | 33.8  | 13.9 | 24.3 | 61.8 | 38.2 | -0.094  | -0.272  |
|        | B       | 28.0 | 33.9  | 14.0 | 24.1 | 61.9 | 38.1 | -0.095  | -0.265  |
|        | C       | 28.1 | 33.5  | 13.7 | 24.7 | 61.5 | 38.4 | -0.087  | -0.286  |
|        | D       | 28.0 | 34.2  | 14.5 | 23.4 | 62.2 | 37.9 | -0.100  | -0.235  |
|        | E       | 29.5 | 32.8  | 12.5 | 25.2 | 62.3 | 37.7 | -0.053  | -0.339  |
|        | F       | 29.4 | 33.6  | 12.5 | 24.5 | 63.0 | 37.0 | -0.066  | -0.325  |
|        | G       | 29.2 | 34.0  | 12.2 | 24.6 | 63.2 | 36.8 | -0.077  | -0.337  |
|        | H       | 29.5 | 32.9  | 12.0 | 25.7 | 62.4 | 37.7 | -0.054  | -0.363  |
|        | I       | 26.3 | 31.8  | 14.1 | 27.7 | 58.1 | 41.8 | -0.096  | -0.325  |
| ND6    | A       | 37.8 | 16.7  | 11.4 | 34.1 | 54.5 | 45.5 | 0.387   | -0.499  |
|        | B       | 39.4 | 17.1  | 11.8 | 31.7 | 56.5 | 43.5 | 0.395   | -0.457  |
|        | C       | 39.2 | 16.3  | 10.6 | 33.9 | 55.5 | 44.5 | 0.413   | -0.524  |
|        | D       | 39.4 | 16.3  | 10.8 | 33.5 | 55.7 | 44.3 | 0.415   | -0.512  |
|        | E       | 40.7 | 13.9  | 11.9 | 33.5 | 54.6 | 45.4 | 0.491   | -0.477  |
|        | F       | 39.8 | 20.7  | 12.0 | 27.4 | 60.5 | 39.4 | 0.315   | -0.392  |
|        | G       | 43.8 | 17.0  | 9.8  | 29.4 | 60.8 | 39.2 | 0.441   | -0.511  |
|        | H       | 43.6 | 18.2  | 9.4  | 28.8 | 61.8 | 38.2 | 0.411   | -0.508  |
|        | I       | 37.8 | 19.3  | 10.4 | 32.5 | 57.1 | 42.9 | 0.324   | -0.517  |
| CYTB   | A       | 26.7 | 30.4  | 14.5 | 28.3 | 57.1 | 42.8 | -0.065  | -0.322  |
|        | B       | 26.8 | 31.1  | 15.7 | 26.4 | 57.9 | 42.1 | -0.074  | -0.254  |
|        | C       | 27.8 | 31.5  | 14.0 | 26.7 | 59.2 | 40.7 | -0.062  | -0.312  |
|        | D       | 26.9 | 33.2  | 15.3 | 24.6 | 60.1 | 39.9 | -0.105  | -0.233  |
|        | E       | 27.3 | 27.5  | 14.2 | 31.0 | 54.8 | 45.2 | -0.003  | -0.371  |
|        | F       | 27.1 | 31.8  | 14.1 | 27.0 | 58.9 | 41.1 | -0.079  | -0.312  |
|        | G       | 29.0 | 29.3  | 13.3 | 28.4 | 58.3 | 41.7 | -0.006  | -0.363  |
|        | H       | 27.5 | 28.9  | 14.3 | 29.4 | 56.4 | 43.7 | -0.025  | -0.347  |
|        | I       | 25.6 | 27.8  | 15.1 | 31.5 | 53.4 | 46.6 | -0.042  | -0.352  |
| ND5    | A       | 29.7 | 30.4  | 12.9 | 27.0 | 60.1 | 39.9 | -0.012  | -0.353  |
|        | B       | 30.4 | 28.8  | 12.6 | 28.2 | 59.2 | 40.8 | 0.027   | -0.382  |
|        | C       | 30.2 | 28.6  | 12.7 | 28.5 | 58.8 | 41.2 | 0.029   | -0.383  |
|        | D       | 28.7 | 30.8  | 14.1 | 26.4 | 59.5 | 40.5 | -0.035  | -0.304  |
|        | E       | 31.3 | 27.0  | 11.8 | 29.8 | 58.3 | 41.6 | 0.073   | -0.433  |
|        | F       | 31.8 | 30.8  | 13.3 | 24.1 | 62.6 | 37.4 | 0.015   | -0.289  |
|        | G       | 32.3 | 30.0  | 11.6 | 26.1 | 62.3 | 37.7 | 0.037   | -0.385  |
|        | H       | 31.4 | 28.4  | 12.1 | 28.2 | 59.8 | 40.3 | 0.052   | -0.399  |
|        | I       | 29.8 | 32.4  | 12.7 | 25.1 | 62.2 | 37.8 | -0.043  | -0.326  |

A: *Polypedates impresus* (this study); B: *Polypedates mutus* (this study); C: *Polypedates megacephalus*; D: *Polypedates braueri*; E: *Zhangixalus schlegelii*; F: *Zhangixalus dennysi*; G: *Zhangixalus omeimontis*; H: *Zhangixalus arboreus*; I: *Buergeria buergeri*.
