# Supplementary material for: Complete Mitogenomes of Polypedates Tree Frogs Unveil Gene Rearrangement and Concerted Evolution within Rhacophoridae
Source: MDPI journal article supplement (doi:10.3390/ani12182449), 2022-09-16
Supplement: s1 [file s1]

**Table S3.** Mitogenome annotation of *Polypedates impresus* and *Polypedates mutus*.

| Features                       | Strand | Position           |                 | Length             |                 | Intergenic Nucleotides |                 | Start codon - Stop codon |                 | Anticodon |
|--------------------------------|--------|--------------------|-----------------|--------------------|-----------------|------------------------|-----------------|--------------------------|-----------------|-----------|
|                                |        | <i>P. Impresus</i> | <i>P. mutus</i> | <i>P. Impresus</i> | <i>P. mutus</i> | <i>P. Impresus</i>     | <i>P. mutus</i> | <i>P. Impresus</i>       | <i>P. mutus</i> |           |
| <i>tRNA<sup>Thr</sup></i>      | H      | 1-71               | 1-71            | 71                 | 71              | -                      | -               | -                        | -               | TGT       |
| <i>tRNA<sup>Leu</sup>(CUN)</i> | H      | 72-142             | 72-143          | 71                 | 72              | 5                      | 5               | -                        | -               | TAG       |
| <i>tRNA<sup>Pro</sup></i>      | L      | 148-216            | 149-217         | 69                 | 69              | 1                      | 1               | -                        | -               | TGG       |
| <i>tRNA<sup>Phe</sup></i>      | H      | 218-287            | 219-288         | 70                 | 70              | -2                     | -2              | -                        | -               | GAA       |
| 12S <i>rRNA</i>                | H      | 286-1215           | 287-1217        | 930                | 931             | -                      | -               | -                        | -               | -         |
| <i>tRNA<sup>Val</sup></i>      | H      | 1216-1284          | 1218-1286       | 69                 | 69              | -                      | -               | -                        | -               | TAC       |
| 16S <i>rRNA</i>                | H      | 1285-2857          | 1287-2859       | 1573               | 1573            | 2                      | 2               | -                        | -               | -         |
| <i>tRNA<sup>Leu</sup>(UUR)</i> | H      | 2856-2929          | 2862-2935       | 74                 | 74              | 3                      | 3               | -                        | -               | TAA       |
| <i>ND1</i>                     | H      | 2933-3893          | 2939-3899       | 961                | 961             | -                      | -               | ATG - T(AA)              | ATG - T(AA)     | -         |
| <i>tRNA<sup>Ile</sup></i>      | H      | 3894-3964          | 3900-3970       | 71                 | 71              | -1                     | -1              | -                        | -               | GAT       |
| <i>tRNA<sup>Gln</sup></i>      | L      | 3964-4034          | 3970-4040       | 71                 | 71              | -1                     | -1              | -                        | -               | TTG       |
| <i>tRNA<sup>Met</sup></i>      | H      | 4034-4102          | 4040-4108       | 69                 | 69              | -                      | -               | -                        | -               | CAT       |
| <i>ND2</i>                     | H      | 4103-5140          | 4109-5146       | 1038               | 1038            | -2                     | -2              | ATT - TAG                | ATT - TAG       | -         |
| <i>tRNA<sup>Trp</sup></i>      | H      | 5139-5209          | 5145-5215       | 71                 | 71              | -                      | -               | -                        | -               | TCA       |
| <i>tRNA<sup>Ala</sup></i>      | L      | 5210-5279          | 5216-5285       | 70                 | 70              | 1                      | 1               | -                        | -               | TGC       |
| <i>tRNA<sup>Asn</sup></i>      | L      | 5281-5353          | 5287-5359       | 73                 | 73              | -                      | -               | -                        | -               | GTT       |
| <i>OL</i>                      | H      | 5354-5384          | 5360-5390       | 31                 | 30              | -3                     | -3              | -                        | -               | -         |
| <i>tRNA<sup>Cys</sup></i>      | L      | 5381-5445          | 5388-5452       | 65                 | 65              | -                      | -               | -                        | -               | GCA       |
| <i>tRNA<sup>Tyr</sup></i>      | L      | 5446-5512          | 5453-5519       | 67                 | 67              | 4                      | 4               | -                        | -               | GTA       |
| <i>COI</i>                     | H      | 5517-7070          | 5524-7077       | 1554               | 1554            | -13                    | -13             | ATA - AGG                | ATA - AGG       | -         |
| <i>tRNA<sup>Ser</sup>(UCN)</i> | L      | 7058-7128          | 7065-7135       | 71                 | 71              | 1                      | 1               | -                        | -               | TGA       |
| <i>tRNA<sup>Asp</sup></i>      | H      | 7130-7198          | 7137-7205       | 69                 | 69              | -                      | -               | -                        | -               | GTC       |
| <i>COII</i>                    | H      | 7199-7888          | 7206-7895       | 690                | 690             | 5                      | 5               | ATG - TAA                | ATG - TAA       | -         |
| <i>tRNA<sup>Lys</sup></i>      | H      | 7894-7963          | 7901-7971       | 71                 | 71              | -                      | -               | -                        | -               | TTT       |
| NCR                            | H      | 7964-8832          | 7972-8120       | 869                | 149             | -                      | -               | -                        | -               | -         |
| <i>ATP6</i>                    | H      | 8833-9511          | 8121-8799       | 679                | 679             | -                      | -               | ATA - T(AA)              | ATA - T(AA)     | -         |
| <i>COIII</i>                   | H      | 9512-10295         | 8800-9583       | 784                | 784             | -                      | -               | ATG - T(AA)              | ATG - T(AA)     | -         |
| <i>tRNA<sup>Gly</sup></i>      | H      | 10296-10363        | 9584-9651       | 68                 | 68              | -                      | -               | -                        | -               | TCC       |

Table S3. *Cont.*

| Features                       | Strand | Position           |                 | Length             |                 | Intergenic Nucleotides |                 | Start codon - Stop codon |                 | Anticodon |
|--------------------------------|--------|--------------------|-----------------|--------------------|-----------------|------------------------|-----------------|--------------------------|-----------------|-----------|
|                                |        | <i>P. Impresus</i> | <i>P. mutus</i> | <i>P. Impresus</i> | <i>P. mutus</i> | <i>P. Impresus</i>     | <i>P. mutus</i> | <i>P. Impresus</i>       | <i>P. mutus</i> |           |
| <i>ND3</i>                     | H      | 10364-10703        | 9652-9991       | 340                | 340             | -                      | -               | ATG - T(AA)              | ATG - T(AA)     | -         |
| <i>tRNA<sup>Arg</sup></i>      | H      | 10704-10772        | 9992-10060      | 69                 | 69              | -                      | 1               | -                        | -               | TCG       |
| <i>ND4L</i>                    | H      | 10773-11057        | 10062-10346     | 285                | 285             | -7                     | -7              | ATG - TAA                | ATG - TAA       | -         |
| <i>ND4</i>                     | H      | 11051-12413        | 10340-11702     | 1363               | 1363            | -                      | -               | GTG - T(AA)              | ATG - T(AA)     | -         |
| <i>tRNA<sup>His</sup></i>      | H      | 12414-12482        | 11703-11771     | 69                 | 69              | -                      | -               | -                        | -               | GTG       |
| <i>tRNA<sup>Ser(AGY)</sup></i> | H      | 12483-12550        | 11772-11839     | 68                 | 68              | 2                      | 2               | -                        | -               | GCT       |
| <i>ND6</i>                     | L      | 12553-13044        | 11842-12333     | 492                | 492             | -                      | -               | ATG - AGG                | ATG - AGG       | -         |
| <i>tRNA<sup>Glu</sup></i>      | L      | 13045-13113        | 12334-12401     | 68                 | 68              | 4                      | 4               | -                        | -               | TTC       |
| <i>CYTB</i>                    | H      | 13118-14273        | 12406-13558     | 1156               | 1153            | -                      | -               | ATG - T(AA)              | ATG - T(AA)     | -         |
| <i>CR1</i>                     | H      | 14274-15674        | 13559-15517     | 1401               | 1959            | -                      | -               | -                        | -               | -         |
| <i>ND5</i>                     | H      | 15675-17456        | 15518-17296     | 1782               | 1779            | -                      | -               | ATG - TAA                | ATG - TAA       | -         |
| <i>CR2</i>                     | H      | 17457-19720        | 17297-20056     | 2264               | 2760            | -                      | -               | -                        | -               | -         |

The letters "H" and "L" stand for heavy and light strands, respectively. A positive value denotes the base-pair spacing between genes, whereas a negative number indicates that the base-pair intervals between genes are overlapping.
