# Supplementary material for: Complete Mitogenomes of Polypedates Tree Frogs Unveil Gene Rearrangement and Concerted Evolution within Rhacophoridae
Source: MDPI journal article supplement (doi:10.3390/ani12182449), 2022-09-16
Supplement: s1 [file s1]

**Table S2.** The best-fit nucleotide partitioning schemes and substitution models determined using PartitionFinder v2.1.1.

| Subsets   | Subset Partitions                             | Best Model |
|-----------|-----------------------------------------------|------------|
| Subset 1  | <i>16S rRNA</i>                               | GTR+I+G    |
| Subset 2  | <i>12S rRNA</i>                               | GTR+I+G    |
| Subset 3  | <i>ATP6</i> 1st Codon                         | GTR+I+G    |
| Subset 4  | <i>ATP6</i> 2nd Codon                         | GTR+I+G    |
| Subset 5  | <i>ATP6</i> 3rd Codon                         | GTR+G      |
| Subset 6  | <i>ATP8</i> 1st Codon, <i>ATP8</i> 2nd Codon  | GTR+I+G    |
| Subset 7  | <i>ATP8</i> 3rd Codon, <i>COIII</i> 3rd Codon | GTR+I+G    |
| Subset 8  | <i>COI</i> 1st Codon                          | SYM+I+G    |
| Subset 9  | <i>COIII</i> 2nd Codon, <i>COI</i> 2nd Codon  | GTR+I+G    |
| Subset 10 | <i>COI</i> 3rd Codon                          | GTR+G      |
| Subset 11 | <i>COII</i> 1st Codon                         | GTR+I+G    |
| Subset 12 | <i>COII</i> 2nd Codon                         | GTR+I+G    |
| Subset 13 | <i>COII</i> 3rd Codon                         | GTR+G      |
| Subset 14 | <i>COIII</i> 1st Codon                        | SYM+I+G    |
| Subset 15 | <i>CYTB</i> 1st Codon                         | GTR+I+G    |
| Subset 16 | <i>ND1</i> 2nd Codon, <i>CYTB</i> 2nd Codon   | GTR+I+G    |
| Subset 17 | <i>CYTB</i> 3rd Codon                         | GTR+I+G    |
| Subset 18 | <i>ND1</i> 1st Codon                          | GTR+I+G    |
| Subset 19 | <i>ND1</i> 3rd Codon                          | GTR+G      |
| Subset 20 | <i>ND2</i> 1st Codon                          | GTR+I+G    |
| Subset 21 | <i>ND2</i> 2nd Codon                          | GTR+I+G    |
| Subset 22 | <i>ND2</i> 3rd Codon                          | GTR+G      |
| Subset 23 | <i>ND3</i> 1st Codon                          | SYM+I+G    |
| Subset 24 | <i>ND3</i> 2nd Codon                          | GTR+I+G    |
| Subset 25 | <i>ND3</i> 3rd Codon                          | GTR+I+G    |
| Subset 26 | <i>ND4L</i> 1st Codon                         | GTR+G      |
| Subset 27 | <i>ND4L</i> 2nd Codon                         | GTR+G      |
| Subset 28 | <i>ND4</i> 3rd Codon, <i>ND4L</i> 3rd Codon   | GTR+I+G    |
| Subset 29 | <i>ND4</i> 1st Codon                          | GTR+I+G    |
| Subset 30 | <i>ND4</i> 2nd Codon, <i>ND5</i> 2nd Codon    | GTR+I+G    |
| Subset 31 | <i>ND5</i> 1st Codon                          | GTR+I+G    |
| Subset 32 | <i>ND5</i> 3rd Codon                          | GTR+G      |
| Subset 33 | <i>ND6</i> 1st Codon                          | GTR+I+G    |
| Subset 34 | <i>ND6</i> 2nd Codon                          | GTR+I+G    |
| Subset 35 | <i>ND6</i> 3rd Codon                          | GTR+G      |
