# Supplementary material for: Complete Mitogenomes of Polypedates Tree Frogs Unveil Gene Rearrangement and Concerted Evolution within Rhacophoridae
Source: MDPI journal article supplement (doi:10.3390/ani12182449), 2022-09-16
Supplement: s1 [file s1]

Table S6. Mitogenome codon usage of nine rhacophorids.

| <i>A Polypedates impresus</i> |       |       |      |         |
|-------------------------------|-------|-------|------|---------|
| AA                            | Codon | Count | RSCU | AARatio |
| Phe                           | UUU   | 171   | 1.29 |         |
| Phe                           | UUC   | 95    | 0.71 | 7.19%   |
| Leu2                          | UUA   | 162   | 1.66 |         |
| Leu2                          | UUG   | 30    | 0.31 | 5.19%   |
| Leu1                          | CUU   | 139   | 1.42 |         |
| Leu1                          | CUC   | 67    | 0.69 |         |
| Leu1                          | CUA   | 134   | 1.37 |         |
| Leu1                          | CUG   | 54    | 0.55 | 10.65%  |
| Ile                           | AUU   | 237   | 1.52 |         |
| Ile                           | AUC   | 74    | 0.48 | 8.41%   |
| Met                           | AUA   | 155   | 1.53 |         |
| Met                           | AUG   | 47    | 0.47 | 5.46%   |
| Val                           | GUU   | 84    | 1.66 |         |
| Val                           | GUC   | 26    | 0.51 |         |
| Val                           | GUA   | 57    | 1.13 |         |
| Val                           | GUG   | 35    | 0.69 | 5.46%   |
| Ser2                          | UCU   | 50    | 1.24 |         |
| Ser2                          | UCC   | 45    | 1.12 |         |
| Ser2                          | UCA   | 86    | 2.13 |         |
| Ser2                          | UCG   | 13    | 0.32 | 5.24%   |
| Pro                           | CCU   | 38    | 0.81 |         |
| Pro                           | CCC   | 45    | 0.96 |         |
| Pro                           | CCA   | 91    | 1.94 |         |
| Pro                           | CCG   | 14    | 0.3  | 5.08%   |
| Thr                           | ACU   | 73    | 0.98 |         |
| Thr                           | ACC   | 80    | 1.07 |         |
| Thr                           | ACA   | 123   | 1.65 |         |
| Thr                           | ACG   | 22    | 0.3  | 8.05%   |
| Ala                           | GCU   | 71    | 0.87 |         |
| Ala                           | GCC   | 111   | 1.35 |         |
| Ala                           | GCA   | 124   | 1.51 |         |
| Ala                           | GCG   | 22    | 0.27 | 8.86%   |
| Tyr                           | UAU   | 67    | 1.15 |         |
| Tyr                           | UAC   | 50    | 0.85 | 3.16%   |
| His                           | CAU   | 45    | 0.88 |         |
| His                           | CAC   | 57    | 1.12 | 2.76%   |
| Gln                           | CAA   | 70    | 1.71 |         |
| Gln                           | CAG   | 12    | 0.29 | 2.22%   |
| Asn                           | AAU   | 63    | 0.95 |         |
| Asn                           | AAC   | 69    | 1.05 | 3.57%   |
| Lys                           | AAA   | 76    | 1.73 |         |
| Lys                           | AAG   | 12    | 0.27 | 2.38%   |
| Asp                           | GAU   | 25    | 0.74 |         |
| Asp                           | GAC   | 43    | 1.26 | 1.84%   |
| Glu                           | GAA   | 47    | 1.18 |         |
| Glu                           | GAG   | 33    | 0.82 | 2.16%   |
| Cys                           | UGU   | 12    | 0.92 |         |
| Cys                           | UGC   | 14    | 1.08 | 0.7%    |
| Trp                           | UGA   | 84    | 1.66 |         |
| Trp                           | UGG   | 17    | 0.34 | 2.73%   |
| Arg                           | CGU   | 10    | 0.61 |         |
| Arg                           | CGC   | 31    | 1.88 |         |
| Arg                           | CGA   | 19    | 1.15 |         |
| Arg                           | CGG   | 6     | 0.36 | 1.78%   |
| Ser1                          | AGU   | 19    | 0.47 |         |
| Ser1                          | AGC   | 29    | 0.72 | 1.3%    |
| Gly                           | GGU   | 34    | 0.63 |         |
| Gly                           | GGC   | 89    | 1.66 |         |
| Gly                           | GGA   | 61    | 1.13 |         |
| Gly                           | GGG   | 31    | 0.58 | 5.81%   |

Table S6. Cont.

| <i>B Polypedates mutus</i> |       |       |      |         |
|----------------------------|-------|-------|------|---------|
| AA                         | Codon | Count | RSCU | AARatio |
| Phe                        | UUU   | 171   | 1.29 |         |
| Phe                        | UUC   | 95    | 0.71 | 7.19%   |
| Leu2                       | UUA   | 178   | 1.81 |         |
| Leu2                       | UUG   | 34    | 0.35 | 5.73%   |
| Leu1                       | CUU   | 122   | 1.24 |         |
| Leu1                       | CUC   | 83    | 0.85 |         |
| Leu1                       | CUA   | 127   | 1.29 |         |
| Leu1                       | CUG   | 45    | 0.46 | 10.19%  |
| Ile                        | AUU   | 226   | 1.43 |         |
| Ile                        | AUC   | 89    | 0.57 | 8.52%   |
| Met                        | AUA   | 145   | 1.42 |         |
| Met                        | AUG   | 59    | 0.58 | 5.52%   |
| Val                        | GUU   | 58    | 1.23 |         |
| Val                        | GUC   | 32    | 0.68 |         |
| Val                        | GUA   | 70    | 1.48 |         |
| Val                        | GUG   | 29    | 0.61 | 5.11%   |
| Ser2                       | UCU   | 41    | 1    |         |
| Ser2                       | UCC   | 57    | 1.39 |         |
| Ser2                       | UCA   | 91    | 2.22 |         |
| Ser2                       | UCG   | 10    | 0.24 | 5.38%   |
| Pro                        | CCU   | 35    | 0.73 |         |
| Pro                        | CCC   | 41    | 0.86 |         |
| Pro                        | CCA   | 95    | 1.99 |         |
| Pro                        | CCG   | 20    | 0.42 | 5.16%   |
| Thr                        | ACU   | 70    | 0.93 |         |
| Thr                        | ACC   | 85    | 1.13 |         |
| Thr                        | ACA   | 124   | 1.65 |         |
| Thr                        | ACG   | 21    | 0.28 | 8.11%   |
| Ala                        | GCU   | 63    | 0.77 |         |
| Ala                        | GCC   | 122   | 1.5  |         |
| Ala                        | GCA   | 125   | 1.53 |         |
| Ala                        | GCG   | 16    | 0.2  | 8.82%   |
| Tyr                        | UAU   | 64    | 1.15 |         |
| Tyr                        | UAC   | 47    | 0.85 | 3%      |
| His                        | CAU   | 34    | 0.69 |         |
| His                        | CAC   | 65    | 1.31 | 2.68%   |
| Gln                        | CAA   | 68    | 1.7  |         |
| Gln                        | CAG   | 12    | 0.3  | 2.16%   |
| Asn                        | AAU   | 59    | 0.94 |         |
| Asn                        | AAC   | 67    | 1.06 | 3.41%   |
| Lys                        | AAA   | 72    | 1.62 |         |
| Lys                        | AAG   | 17    | 0.38 | 2.41%   |
| Asp                        | GAU   | 28    | 0.77 |         |
| Asp                        | GAC   | 45    | 1.23 | 1.97%   |
| Glu                        | GAA   | 54    | 1.37 |         |
| Glu                        | GAG   | 25    | 0.63 | 2.14%   |
| Cys                        | UGU   | 11    | 0.79 |         |
| Cys                        | UGC   | 17    | 1.21 | 0.76%   |
| Trp                        | UGA   | 82    | 1.59 |         |
| Trp                        | UGG   | 21    | 0.41 | 2.79%   |
| Arg                        | CGU   | 15    | 0.87 |         |
| Arg                        | CGC   | 17    | 0.99 |         |
| Arg                        | CGA   | 29    | 1.68 |         |
| Arg                        | CGG   | 8     | 0.46 | 1.87%   |
| Ser1                       | AGU   | 18    | 0.44 |         |
| Ser1                       | AGC   | 29    | 0.71 | 1.27%   |
| Gly                        | GGU   | 34    | 0.63 |         |
| Gly                        | GGC   | 84    | 1.56 |         |
| Gly                        | GGA   | 49    | 0.91 |         |
| Gly                        | GGG   | 48    | 0.89 | 5.81%   |

Table S6. *Cont.*

| <i>C Polypedates megacephalus</i> |       |       |      |         |
|-----------------------------------|-------|-------|------|---------|
| AA                                | Codon | Count | RSCU | AARatio |
| Phe                               | UUU   | 167   | 1.27 |         |
| Phe                               | UUC   | 95    | 0.73 | 7.08%   |
| Leu2                              | UUA   | 154   | 1.57 |         |
| Leu2                              | UUG   | 36    | 0.37 | 5.14%   |
| Leu1                              | CUU   | 131   | 1.33 |         |
| Leu1                              | CUC   | 85    | 0.86 |         |
| Leu1                              | CUA   | 135   | 1.37 |         |
| Leu1                              | CUG   | 49    | 0.5  | 10.81%  |
| Ile                               | AUU   | 221   | 1.43 |         |
| Ile                               | AUC   | 89    | 0.57 | 8.38%   |
| Met                               | AUA   | 156   | 1.56 |         |
| Met                               | AUG   | 44    | 0.44 | 5.41%   |
| Val                               | GUU   | 79    | 1.54 |         |
| Val                               | GUC   | 39    | 0.76 |         |
| Val                               | GUA   | 59    | 1.15 |         |
| Val                               | GUG   | 28    | 0.55 | 5.54%   |
| Ser2                              | UCU   | 41    | 1.05 |         |
| Ser2                              | UCC   | 44    | 1.12 |         |
| Ser2                              | UCA   | 91    | 2.32 |         |
| Ser2                              | UCG   | 15    | 0.38 | 5.16%   |
| Pro                               | CCU   | 41    | 0.85 |         |
| Pro                               | CCC   | 44    | 0.91 |         |
| Pro                               | CCA   | 92    | 1.91 |         |
| Pro                               | CCG   | 16    | 0.33 | 5.22%   |
| Thr                               | ACU   | 70    | 0.93 |         |
| Thr                               | ACC   | 80    | 1.06 |         |
| Thr                               | ACA   | 128   | 1.7  |         |
| Thr                               | ACG   | 24    | 0.32 | 8.16%   |
| Ala                               | GCU   | 76    | 0.93 |         |
| Ala                               | GCC   | 105   | 1.28 |         |
| Ala                               | GCA   | 131   | 1.6  |         |
| Ala                               | GCG   | 16    | 0.2  | 8.87%   |
| Tyr                               | UAU   | 66    | 1.15 |         |
| Tyr                               | UAC   | 49    | 0.85 | 3.11%   |
| His                               | CAU   | 36    | 0.72 |         |
| His                               | CAC   | 64    | 1.28 | 2.7%    |
| Gln                               | CAA   | 66    | 1.63 |         |
| Gln                               | CAG   | 15    | 0.37 | 2.19%   |
| Asn                               | AAU   | 59    | 0.94 |         |
| Asn                               | AAC   | 67    | 1.06 | 3.41%   |
| Lys                               | AAA   | 72    | 1.66 |         |
| Lys                               | AAG   | 15    | 0.34 | 2.35%   |
| Asp                               | GAU   | 27    | 0.76 |         |
| Asp                               | GAC   | 44    | 1.24 | 1.92%   |
| Glu                               | GAA   | 54    | 1.37 |         |
| Glu                               | GAG   | 25    | 0.63 | 2.14%   |
| Cys                               | UGU   | 10    | 0.77 |         |
| Cys                               | UGC   | 16    | 1.23 | 0.7%    |
| Trp                               | UGA   | 84    | 1.66 |         |
| Trp                               | UGG   | 17    | 0.34 | 2.73%   |
| Arg                               | CGU   | 10    | 0.57 |         |
| Arg                               | CGC   | 30    | 1.71 |         |
| Arg                               | CGA   | 22    | 1.26 |         |
| Arg                               | CGG   | 8     | 0.46 | 1.89%   |
| Ser1                              | AGU   | 15    | 0.38 |         |
| Ser1                              | AGC   | 29    | 0.74 | 1.19%   |
| Gly                               | GGU   | 32    | 0.59 |         |
| Gly                               | GGC   | 96    | 1.76 |         |
| Gly                               | GGA   | 53    | 0.97 |         |
| Gly                               | GGG   | 37    | 0.68 | 5.89%   |

Table S6. *Cont.*

| <i>D Polypedates braueri</i> |       |       |      |         |
|------------------------------|-------|-------|------|---------|
| AA                           | Codon | Count | RSCU | AARatio |
| Phe                          | UUU   | 185   | 1.37 |         |
| Phe                          | UUC   | 86    | 0.63 | 7.33%   |
| Leu2                         | UUA   | 183   | 1.88 |         |
| Leu2                         | UUG   | 38    | 0.39 | 5.98%   |
| Leu1                         | CUU   | 120   | 1.23 |         |
| Leu1                         | CUC   | 69    | 0.71 |         |
| Leu1                         | CUA   | 116   | 1.19 |         |
| Leu1                         | CUG   | 59    | 0.61 | 9.84%   |
| Ile                          | AUU   | 238   | 1.52 |         |
| Ile                          | AUC   | 75    | 0.48 | 8.46%   |
| Met                          | AUA   | 141   | 1.46 |         |
| Met                          | AUG   | 52    | 0.54 | 5.22%   |
| Val                          | GUU   | 73    | 1.37 |         |
| Val                          | GUC   | 32    | 0.6  |         |
| Val                          | GUA   | 73    | 1.37 |         |
| Val                          | GUG   | 35    | 0.66 | 5.76%   |
| Ser2                         | UCU   | 52    | 1.21 |         |
| Ser2                         | UCC   | 48    | 1.12 |         |
| Ser2                         | UCA   | 86    | 2    |         |
| Ser2                         | UCG   | 18    | 0.42 | 5.52%   |
| Pro                          | CCU   | 38    | 0.82 |         |
| Pro                          | CCC   | 28    | 0.6  |         |
| Pro                          | CCA   | 98    | 2.11 |         |
| Pro                          | CCG   | 22    | 0.47 | 5.03%   |
| Thr                          | ACU   | 72    | 1.05 |         |
| Thr                          | ACC   | 80    | 1.17 |         |
| Thr                          | ACA   | 101   | 1.47 |         |
| Thr                          | ACG   | 21    | 0.31 | 7.41%   |
| Ala                          | GCU   | 77    | 0.93 |         |
| Ala                          | GCC   | 105   | 1.27 |         |
| Ala                          | GCA   | 126   | 1.52 |         |
| Ala                          | GCG   | 24    | 0.29 | 8.98%   |
| Tyr                          | UAU   | 72    | 1.29 |         |
| Tyr                          | UAC   | 40    | 0.71 | 3.03%   |
| His                          | CAU   | 39    | 0.8  |         |
| His                          | CAC   | 58    | 1.2  | 2.62%   |
| Gln                          | CAA   | 70    | 1.56 |         |
| Gln                          | CAG   | 20    | 0.44 | 2.43%   |
| Asn                          | AAU   | 79    | 1.33 |         |
| Asn                          | AAC   | 40    | 0.67 | 3.22%   |
| Lys                          | AAA   | 66    | 1.53 |         |
| Lys                          | AAG   | 20    | 0.47 | 2.33%   |
| Asp                          | GAU   | 29    | 0.79 |         |
| Asp                          | GAC   | 44    | 1.21 | 1.97%   |
| Glu                          | GAA   | 58    | 1.45 |         |
| Glu                          | GAG   | 22    | 0.55 | 2.16%   |
| Cys                          | UGU   | 11    | 0.81 |         |
| Cys                          | UGC   | 16    | 1.19 | 0.73%   |
| Trp                          | UGA   | 81    | 1.54 |         |
| Trp                          | UGG   | 24    | 0.46 | 2.84%   |
| Arg                          | CGU   | 9     | 0.52 |         |
| Arg                          | CGC   | 24    | 1.39 |         |
| Arg                          | CGA   | 26    | 1.51 |         |
| Arg                          | CGG   | 10    | 0.58 | 1.87%   |
| Ser1                         | AGU   | 19    | 0.44 |         |
| Ser1                         | AGC   | 35    | 0.81 | 1.46%   |
| Gly                          | GGU   | 41    | 0.76 |         |
| Gly                          | GGC   | 90    | 1.67 |         |
| Gly                          | GGA   | 49    | 0.91 |         |
| Gly                          | GGG   | 35    | 0.65 | 5.81%   |

Table S6. Cont.

| E <i>Zhangixalus schlegeli</i> |       |       |      |         |
|--------------------------------|-------|-------|------|---------|
| AA                             | Codon | Count | RSCU | AARatio |
| Phe                            | UUU   | 167   | 1.3  |         |
| Phe                            | UUC   | 89    | 0.7  | 6.86%   |
| Leu2                           | UUA   | 161   | 1.66 |         |
| Leu2                           | UUG   | 31    | 0.32 | 5.14%   |
| Leu1                           | CUU   | 99    | 1.02 |         |
| Leu1                           | CUC   | 78    | 0.81 |         |
| Leu1                           | CUA   | 177   | 1.83 |         |
| Leu1                           | CUG   | 35    | 0.36 | 10.42%  |
| Ile                            | AUU   | 211   | 1.33 |         |
| Ile                            | AUC   | 107   | 0.67 | 8.52%   |
| Met                            | AUA   | 153   | 1.52 |         |
| Met                            | AUG   | 48    | 0.48 | 5.38%   |
| Val                            | GUU   | 57    | 1.21 |         |
| Val                            | GUC   | 32    | 0.68 |         |
| Val                            | GUA   | 80    | 1.69 |         |
| Val                            | GUG   | 20    | 0.42 | 5.06%   |
| Ser2                           | UCU   | 64    | 1.43 |         |
| Ser2                           | UCC   | 63    | 1.41 |         |
| Ser2                           | UCA   | 89    | 1.99 |         |
| Ser2                           | UCG   | 8     | 0.18 | 6%      |
| Pro                            | CCU   | 30    | 0.61 |         |
| Pro                            | CCC   | 74    | 1.49 |         |
| Pro                            | CCA   | 87    | 1.76 |         |
| Pro                            | CCG   | 7     | 0.14 | 5.3%    |
| Thr                            | ACU   | 65    | 0.87 |         |
| Thr                            | ACC   | 101   | 1.36 |         |
| Thr                            | ACA   | 121   | 1.62 |         |
| Thr                            | ACG   | 11    | 0.15 | 7.98%   |
| Ala                            | GCU   | 73    | 0.93 |         |
| Ala                            | GCC   | 130   | 1.65 |         |
| Ala                            | GCA   | 100   | 1.27 |         |
| Ala                            | GCG   | 12    | 0.15 | 8.44%   |
| Tyr                            | UAU   | 55    | 1.05 |         |
| Tyr                            | UAC   | 50    | 0.95 | 2.81%   |
| His                            | CAU   | 36    | 0.71 |         |
| His                            | CAC   | 66    | 1.29 | 2.73%   |
| Gln                            | CAA   | 79    | 1.8  |         |
| Gln                            | CAG   | 9     | 0.2  | 2.36%   |
| Asn                            | AAU   | 49    | 0.72 |         |
| Asn                            | AAC   | 88    | 1.28 | 3.67%   |
| Lys                            | AAA   | 79    | 1.72 |         |
| Lys                            | AAG   | 13    | 0.28 | 2.46%   |
| Asp                            | GAU   | 29    | 0.82 |         |
| Asp                            | GAC   | 42    | 1.18 | 1.9%    |
| Glu                            | GAA   | 63    | 1.5  |         |
| Glu                            | GAG   | 21    | 0.5  | 2.25%   |
| Cys                            | UGU   | 12    | 0.77 |         |
| Cys                            | UGC   | 19    | 1.23 | 0.83%   |
| Trp                            | UGA   | 91    | 1.64 |         |
| Trp                            | UGG   | 20    | 0.36 | 2.97%   |
| Arg                            | CGU   | 8     | 0.45 |         |
| Arg                            | CGC   | 13    | 0.73 |         |
| Arg                            | CGA   | 45    | 2.54 |         |
| Arg                            | CGG   | 5     | 0.28 | 1.9%    |
| Ser1                           | AGU   | 16    | 0.36 |         |
| Ser1                           | AGC   | 28    | 0.63 | 1.18%   |
| Gly                            | GGU   | 33    | 0.61 |         |
| Gly                            | GGC   | 52    | 0.95 |         |
| Gly                            | GGA   | 89    | 1.63 |         |
| Gly                            | GGG   | 44    | 0.81 | 5.84%   |

Table S6. Cont.

| F <i>Zhangixalus demmysi</i> |       |       |      |         |
|------------------------------|-------|-------|------|---------|
| AA                           | Codon | Count | RSCU | AARatio |
| Phe                          | UUU   | 168   | 1.34 |         |
| Phe                          | UUC   | 82    | 0.66 | 6.66%   |
| Leu2                         | UUA   | 192   | 1.92 |         |
| Leu2                         | UUG   | 32    | 0.32 | 5.97    |
| Leu1                         | CUU   | 115   | 1.15 |         |
| Leu1                         | CUC   | 76    | 0.76 |         |
| Leu1                         | CUA   | 162   | 1.62 |         |
| Leu1                         | CUG   | 22    | 0.22 | 9.99%   |
| Ile                          | AUU   | 224   | 1.37 |         |
| Ile                          | AUC   | 104   | 0.63 | 8.74%   |
| Met                          | AUA   | 151   | 1.5  |         |
| Met                          | AUG   | 50    | 0.5  | 5.36%   |
| Val                          | GUU   | 52    | 1.2  |         |
| Val                          | GUC   | 31    | 0.71 |         |
| Val                          | GUA   | 74    | 1.7  |         |
| Val                          | GUG   | 17    | 0.39 | 4.64%   |
| Ser2                         | UCU   | 59    | 1.25 |         |
| Ser2                         | UCC   | 67    | 1.42 |         |
| Ser2                         | UCA   | 100   | 2.11 |         |
| Ser2                         | UCG   | 8     | 0.17 | 6.24%   |
| Pro                          | CCU   | 32    | 0.65 |         |
| Pro                          | CCC   | 58    | 1.18 |         |
| Pro                          | CCA   | 98    | 1.99 |         |
| Pro                          | CCG   | 9     | 0.18 | 5.25%   |
| Thr                          | ACU   | 72    | 0.96 |         |
| Thr                          | ACC   | 99    | 1.32 |         |
| Thr                          | ACA   | 123   | 1.64 |         |
| Thr                          | ACG   | 6     | 0.08 | 8%      |
| Ala                          | GCU   | 75    | 0.96 |         |
| Ala                          | GCC   | 123   | 1.57 |         |
| Ala                          | GCA   | 104   | 1.33 |         |
| Ala                          | GCG   | 11    | 0.14 | 8.34%   |
| Tyr                          | UAU   | 63    | 1.16 |         |
| Tyr                          | UAC   | 46    | 0.84 | 2.91%   |
| His                          | CAU   | 40    | 0.82 |         |
| His                          | CAC   | 58    | 1.18 | 2.61%   |
| Gln                          | CAA   | 90    | 1.96 |         |
| Gln                          | CAG   | 2     | 0.04 | 2.45%   |
| Asn                          | AAU   | 58    | 0.82 |         |
| Asn                          | AAC   | 83    | 1.18 | 3.76%   |
| Lys                          | AAA   | 75    | 1.7  |         |
| Lys                          | AAG   | 13    | 0.3  | 2.35%   |
| Asp                          | GAU   | 31    | 0.9  |         |
| Asp                          | GAC   | 38    | 1.1  | 1.84%   |
| Glu                          | GAA   | 71    | 1.65 |         |
| Glu                          | GAG   | 15    | 0.35 | 2.29%   |
| Cys                          | UGU   | 19    | 1.27 |         |
| Cys                          | UGC   | 11    | 0.73 | 0.8%    |
| Trp                          | UGA   | 96    | 1.73 |         |
| Trp                          | UGG   | 15    | 0.27 | 2.96%   |
| Arg                          | CGU   | 8     | 0.46 |         |
| Arg                          | CGC   | 11    | 0.64 |         |
| Arg                          | CGA   | 46    | 2.67 |         |
| Arg                          | CGG   | 4     | 0.23 | 1.84%   |
| Ser1                         | AGU   | 22    | 0.46 |         |
| Ser1                         | AGC   | 28    | 0.59 | 1.33%   |
| Gly                          | GGU   | 43    | 0.81 |         |
| Gly                          | GGC   | 50    | 0.94 |         |
| Gly                          | GGA   | 79    | 1.48 |         |
| Gly                          | GGG   | 41    | 0.77 | 5.68%   |

Table S6. Cont.

| <i>G Zhangixalus omeimontis</i> |       |       |      |         |
|---------------------------------|-------|-------|------|---------|
| AA                              | Codon | Count | RSCU | AARatio |
| Phe                             | UUU   | 173   | 1.36 |         |
| Phe                             | UUC   | 82    | 0.64 | 6.72%   |
| Leu2                            | UUA   | 196   | 2.01 |         |
| Leu2                            | UUG   | 22    | 0.23 | 5.75%   |
| Leu1                            | CUU   | 129   | 1.32 |         |
| Leu1                            | CUC   | 51    | 0.52 |         |
| Leu1                            | CUA   | 159   | 1.63 |         |
| Leu1                            | CUG   | 28    | 0.29 | 9.68%   |
| Ile                             | AUU   | 247   | 1.44 |         |
| Ile                             | AUC   | 97    | 0.56 | 9.07%   |
| Met                             | AUA   | 185   | 1.57 |         |
| Met                             | AUG   | 51    | 0.43 | 6.22%   |
| Val                             | GUU   | 58    | 1.27 |         |
| Val                             | GUC   | 27    | 0.59 |         |
| Val                             | GUA   | 75    | 1.65 |         |
| Val                             | GUG   | 22    | 0.48 | 4.8%    |
| Ser2                            | UCU   | 64    | 1.37 |         |
| Ser2                            | UCC   | 62    | 1.32 |         |
| Ser2                            | UCA   | 104   | 2.22 |         |
| Ser2                            | UCG   | 6     | 0.13 | 6.22%   |
| Pro                             | CCU   | 33    | 0.67 |         |
| Pro                             | CCC   | 61    | 1.24 |         |
| Pro                             | CCA   | 98    | 1.99 |         |
| Pro                             | CCG   | 5     | 0.1  | 5.2%    |
| Thr                             | ACU   | 88    | 1.21 |         |
| Thr                             | ACC   | 78    | 1.07 |         |
| Thr                             | ACA   | 116   | 1.59 |         |
| Thr                             | ACG   | 9     | 0.12 | 7.67%   |
| Ala                             | GCU   | 78    | 1.03 |         |
| Ala                             | GCC   | 117   | 1.55 |         |
| Ala                             | GCA   | 103   | 1.36 |         |
| Ala                             | GCG   | 4     | 0.05 | 7.96%   |
| Tyr                             | UAU   | 67    | 1.12 |         |
| Tyr                             | UAC   | 53    | 0.88 | 3.16%   |
| His                             | CAU   | 50    | 1.01 |         |
| His                             | CAC   | 49    | 0.99 | 2.61%   |
| Gln                             | CAA   | 80    | 1.88 |         |
| Gln                             | CAG   | 5     | 0.12 | 2.24%   |
| Asn                             | AAU   | 75    | 1.04 |         |
| Asn                             | AAC   | 69    | 0.96 | 3.8%    |
| Lys                             | AAA   | 79    | 1.72 |         |
| Lys                             | AAG   | 13    | 0.28 | 2.43%   |
| Asp                             | GAU   | 37    | 1.01 |         |
| Asp                             | GAC   | 36    | 0.99 | 1.93%   |
| Glu                             | GAA   | 64    | 1.58 |         |
| Glu                             | GAG   | 17    | 0.42 | 2.14%   |
| Cys                             | UGU   | 20    | 1.33 |         |
| Cys                             | UGC   | 10    | 0.67 | 0.79%   |
| Trp                             | UGA   | 94    | 1.71 |         |
| Trp                             | UGG   | 16    | 0.29 | 2.9%    |
| Arg                             | CGU   | 11    | 0.62 |         |
| Arg                             | CGC   | 10    | 0.56 |         |
| Arg                             | CGA   | 45    | 2.54 |         |
| Arg                             | CGG   | 5     | 0.28 | 1.87%   |
| Ser1                            | AGU   | 18    | 0.38 |         |
| Ser1                            | AGC   | 27    | 0.58 | 1.19%   |
| Gly                             | GGU   | 37    | 0.69 |         |
| Gly                             | GGC   | 50    | 0.93 |         |
| Gly                             | GGA   | 85    | 1.59 |         |
| Gly                             | GGG   | 42    | 0.79 | 5.64%   |

Table S6. Cont.

| <i>H Zhangixalus arboreus</i> |       |       |      |         |
|-------------------------------|-------|-------|------|---------|
| AA                            | Codon | Count | RSCU | AARatio |
| Phe                           | UUU   | 168   | 1.34 |         |
| Phe                           | UUC   | 82    | 0.66 | 6.66%   |
| Leu2                          | UUA   | 192   | 1.92 |         |
| Leu2                          | UUG   | 32    | 0.32 | 5.97    |
| Leu1                          | CUU   | 115   | 1.15 |         |
| Leu1                          | CUC   | 76    | 0.76 |         |
| Leu1                          | CUA   | 162   | 1.62 |         |
| Leu1                          | CUG   | 22    | 0.22 | 9.99%   |
| Ile                           | AUU   | 224   | 1.37 |         |
| Ile                           | AUC   | 104   | 0.63 | 8.74%   |
| Met                           | AUA   | 151   | 1.5  |         |
| Met                           | AUG   | 50    | 0.5  | 5.36%   |
| Val                           | GUU   | 52    | 1.2  |         |
| Val                           | GUC   | 31    | 0.71 |         |
| Val                           | GUA   | 74    | 1.7  |         |
| Val                           | GUG   | 17    | 0.39 | 4.64%   |
| Ser2                          | UCU   | 59    | 1.25 |         |
| Ser2                          | UCC   | 67    | 1.42 |         |
| Ser2                          | UCA   | 100   | 2.11 |         |
| Ser2                          | UCG   | 8     | 0.17 | 6.24%   |
| Pro                           | CCU   | 32    | 0.65 |         |
| Pro                           | CCC   | 58    | 1.18 |         |
| Pro                           | CCA   | 98    | 1.99 |         |
| Pro                           | CCG   | 9     | 0.18 | 5.25%   |
| Thr                           | ACU   | 72    | 0.96 |         |
| Thr                           | ACC   | 99    | 1.32 |         |
| Thr                           | ACA   | 123   | 1.64 |         |
| Thr                           | ACG   | 6     | 0.08 | 8%      |
| Ala                           | GCU   | 75    | 0.96 |         |
| Ala                           | GCC   | 123   | 1.57 |         |
| Ala                           | GCA   | 104   | 1.33 |         |
| Ala                           | GCG   | 11    | 0.14 | 8.34%   |
| Tyr                           | UAU   | 63    | 1.16 |         |
| Tyr                           | UAC   | 46    | 0.84 | 2.91%   |
| His                           | CAU   | 40    | 0.82 |         |
| His                           | CAC   | 58    | 1.18 | 2.61%   |
| Gln                           | CAA   | 90    | 1.96 |         |
| Gln                           | CAG   | 2     | 0.04 | 2.45%   |
| Asn                           | AAU   | 58    | 0.82 |         |
| Asn                           | AAC   | 83    | 1.18 | 3.76%   |
| Lys                           | AAA   | 75    | 1.7  |         |
| Lys                           | AAG   | 13    | 0.3  | 2.35%   |
| Asp                           | GAU   | 31    | 0.9  |         |
| Asp                           | GAC   | 38    | 1.1  | 1.84%   |
| Glu                           | GAA   | 71    | 1.65 |         |
| Glu                           | GAG   | 15    | 0.35 | 2.29%   |
| Cys                           | UGU   | 19    | 1.27 |         |
| Cys                           | UGC   | 11    | 0.73 | 0.8%    |
| Trp                           | UGA   | 96    | 1.73 |         |
| Trp                           | UGG   | 15    | 0.27 | 2.96%   |
| Arg                           | CGU   | 8     | 0.46 |         |
| Arg                           | CGC   | 11    | 0.64 |         |
| Arg                           | CGA   | 46    | 2.67 |         |
| Arg                           | CGG   | 4     | 0.23 | 1.84%   |
| Ser1                          | AGU   | 22    | 0.46 |         |
| Ser1                          | AGC   | 28    | 0.59 | 1.33%   |
| Gly                           | GGU   | 43    | 0.81 |         |
| Gly                           | GGC   | 50    | 0.94 |         |
| Gly                           | GGA   | 79    | 1.48 |         |
| Gly                           | GGG   | 41    | 0.77 | 5.68%   |

Table S6. *Cont.*

| <i>I Buergeria buergeri</i> |       |       |      |         |
|-----------------------------|-------|-------|------|---------|
| AA                          | Codon | Count | RSCU | AARatio |
| Phe                         | UUU   | 158   | 1.26 |         |
| Phe                         | UUC   | 92    | 0.74 | 6.64%   |
| Leu2                        | UUA   | 138   | 1.43 |         |
| Leu2                        | UUG   | 28    | 0.29 | 4.41%   |
| Leu1                        | CUU   | 130   | 1.35 |         |
| Leu1                        | CUC   | 102   | 1.06 |         |
| Leu1                        | CUA   | 140   | 1.45 |         |
| Leu1                        | CUG   | 41    | 0.42 | 10.98%  |
| Ile                         | AUU   | 206   | 1.28 |         |
| Ile                         | AUC   | 115   | 0.72 | 8.53%   |
| Met                         | AUA   | 152   | 1.59 |         |
| Met                         | AUG   | 39    | 0.41 | 5.08%   |
| Val                         | GUU   | 69    | 1.33 |         |
| Val                         | GUC   | 52    | 1    |         |
| Val                         | GUA   | 58    | 1.12 |         |
| Val                         | GUG   | 29    | 0.56 | 5.53%   |
| Ser2                        | UCU   | 79    | 1.74 |         |
| Ser2                        | UCC   | 59    | 1.3  |         |
| Ser2                        | UCA   | 82    | 1.8  |         |
| Ser2                        | UCG   | 11    | 0.24 | 6.14%   |
| Pro                         | CCU   | 41    | 0.84 |         |
| Pro                         | CCC   | 56    | 1.14 |         |
| Pro                         | CCA   | 72    | 1.47 |         |
| Pro                         | CCG   | 27    | 0.55 | 5.21%   |
| Thr                         | ACU   | 95    | 1.26 |         |
| Thr                         | ACC   | 79    | 1.05 |         |
| Thr                         | ACA   | 112   | 1.48 |         |
| Thr                         | ACG   | 16    | 0.21 | 8.03%   |
| Ala                         | GCU   | 99    | 1.21 |         |
| Ala                         | GCC   | 126   | 1.54 |         |
| Ala                         | GCA   | 95    | 1.16 |         |
| Ala                         | GCG   | 8     | 0.1  | 8.72%   |
| Tyr                         | UAU   | 60    | 1.03 |         |
| Tyr                         | UAC   | 56    | 0.97 | 3.08%   |
| His                         | CAU   | 32    | 0.65 |         |
| His                         | CAC   | 66    | 1.35 | 2.6%    |
| Gln                         | CAA   | 88    | 1.83 |         |
| Gln                         | CAG   | 8     | 0.17 | 2.55%   |
| Asn                         | AAU   | 64    | 0.96 |         |
| Asn                         | AAC   | 69    | 1.04 | 3.53%   |
| Lys                         | AAA   | 79    | 1.76 |         |
| Lys                         | AAG   | 11    | 0.24 | 2.39%   |
| Asp                         | GAU   | 27    | 0.77 |         |
| Asp                         | GAC   | 43    | 1.23 | 1.86%   |
| Glu                         | GAA   | 71    | 1.58 |         |
| Glu                         | GAG   | 19    | 0.42 | 2.39%   |
| Cys                         | UGU   | 15    | 1.07 |         |
| Cys                         | UGC   | 13    | 0.93 | 0.74%   |
| Trp                         | UGA   | 93    | 1.71 |         |
| Trp                         | UGG   | 16    | 0.29 | 2.9%    |
| Arg                         | CGU   | 15    | 0.81 |         |
| Arg                         | CGC   | 18    | 0.97 |         |
| Arg                         | CGA   | 38    | 2.05 |         |
| Arg                         | CGG   | 3     | 0.16 | 1.97%   |
| Ser1                        | AGU   | 15    | 0.33 |         |
| Ser1                        | AGC   | 27    | 0.59 | 1.12%   |
| Gly                         | GGU   | 39    | 0.74 |         |
| Gly                         | GGC   | 58    | 1.1  |         |
| Gly                         | GGA   | 71    | 1.35 |         |
| Gly                         | GGG   | 43    | 0.82 | 5.61%   |
