# Supplementary material for: Complete Mitogenomes of Polypedates Tree Frogs Unveil Gene Rearrangement and Concerted Evolution within Rhacophoridae
Source: Animals (Basel). 2022 Sep 16;12(18):2449. doi: 10.3390/ani12182449 (PMC9494961; doi:10.3390/ani12182449)
Supplement: Supplementary file 1 [file animals-12-02449-s001.zip]

Archive with 8 entries (8 files):
- Figure S1. Phylogram ML.pdf
- Figure S2. Phylogram BI.pdf
- Table S1. List of Species Used in the Phylogenetic Analyses.pdf
- Table S2. Partitioning Schemes and Substitution Models.pdf
- Table S3. Mitogenome Annotation.pdf
- Table S4. Mitogenome Nucleotide Composition and Skewness.pdf
- Table S5. Start and Stop Codon.pdf
- Table S6. Codon Usage.pdf
