# Supplementary figures and images for: Complete Mitogenomes of Polypedates Tree Frogs Unveil Gene Rearrangement and Concerted Evolution within Rhacophoridae
Source: MDPI journal article supplement (doi:10.3390/ani12182449), 2022-09-16

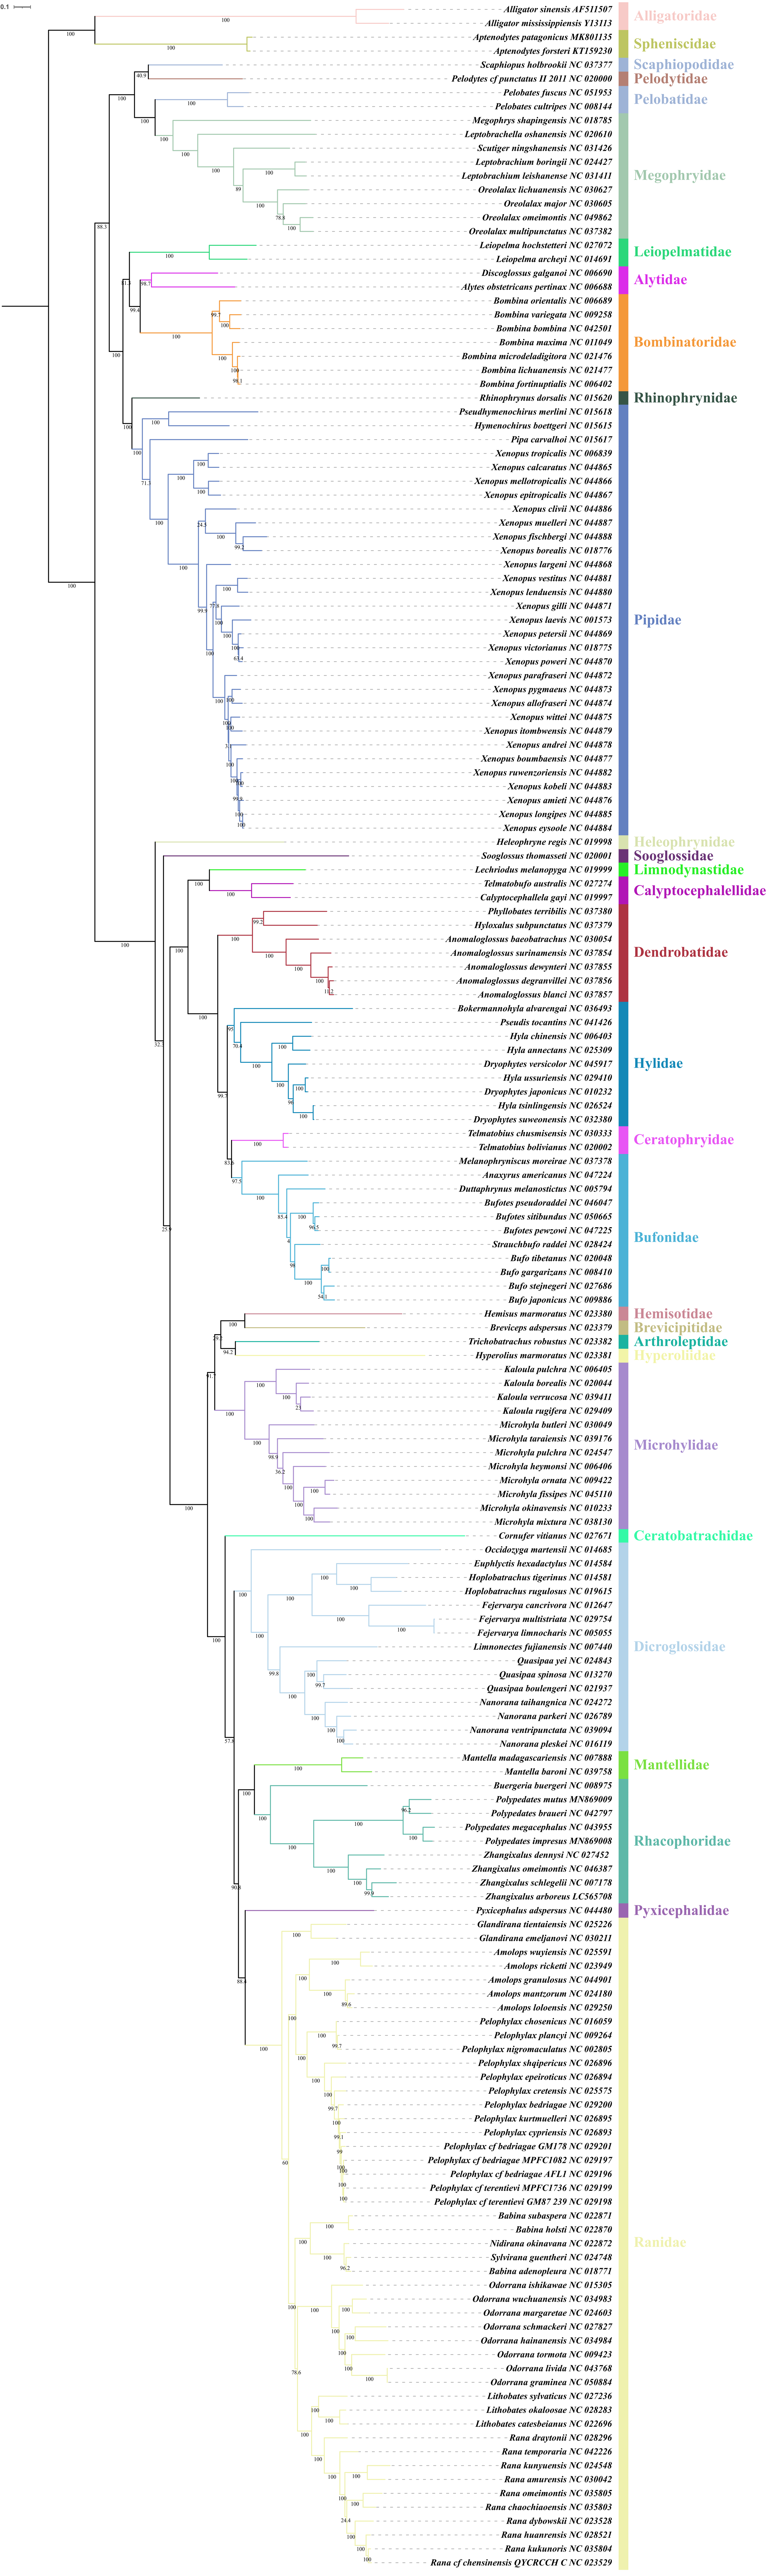

Supplement: s1 [file s1]

Tree scale: 0.1

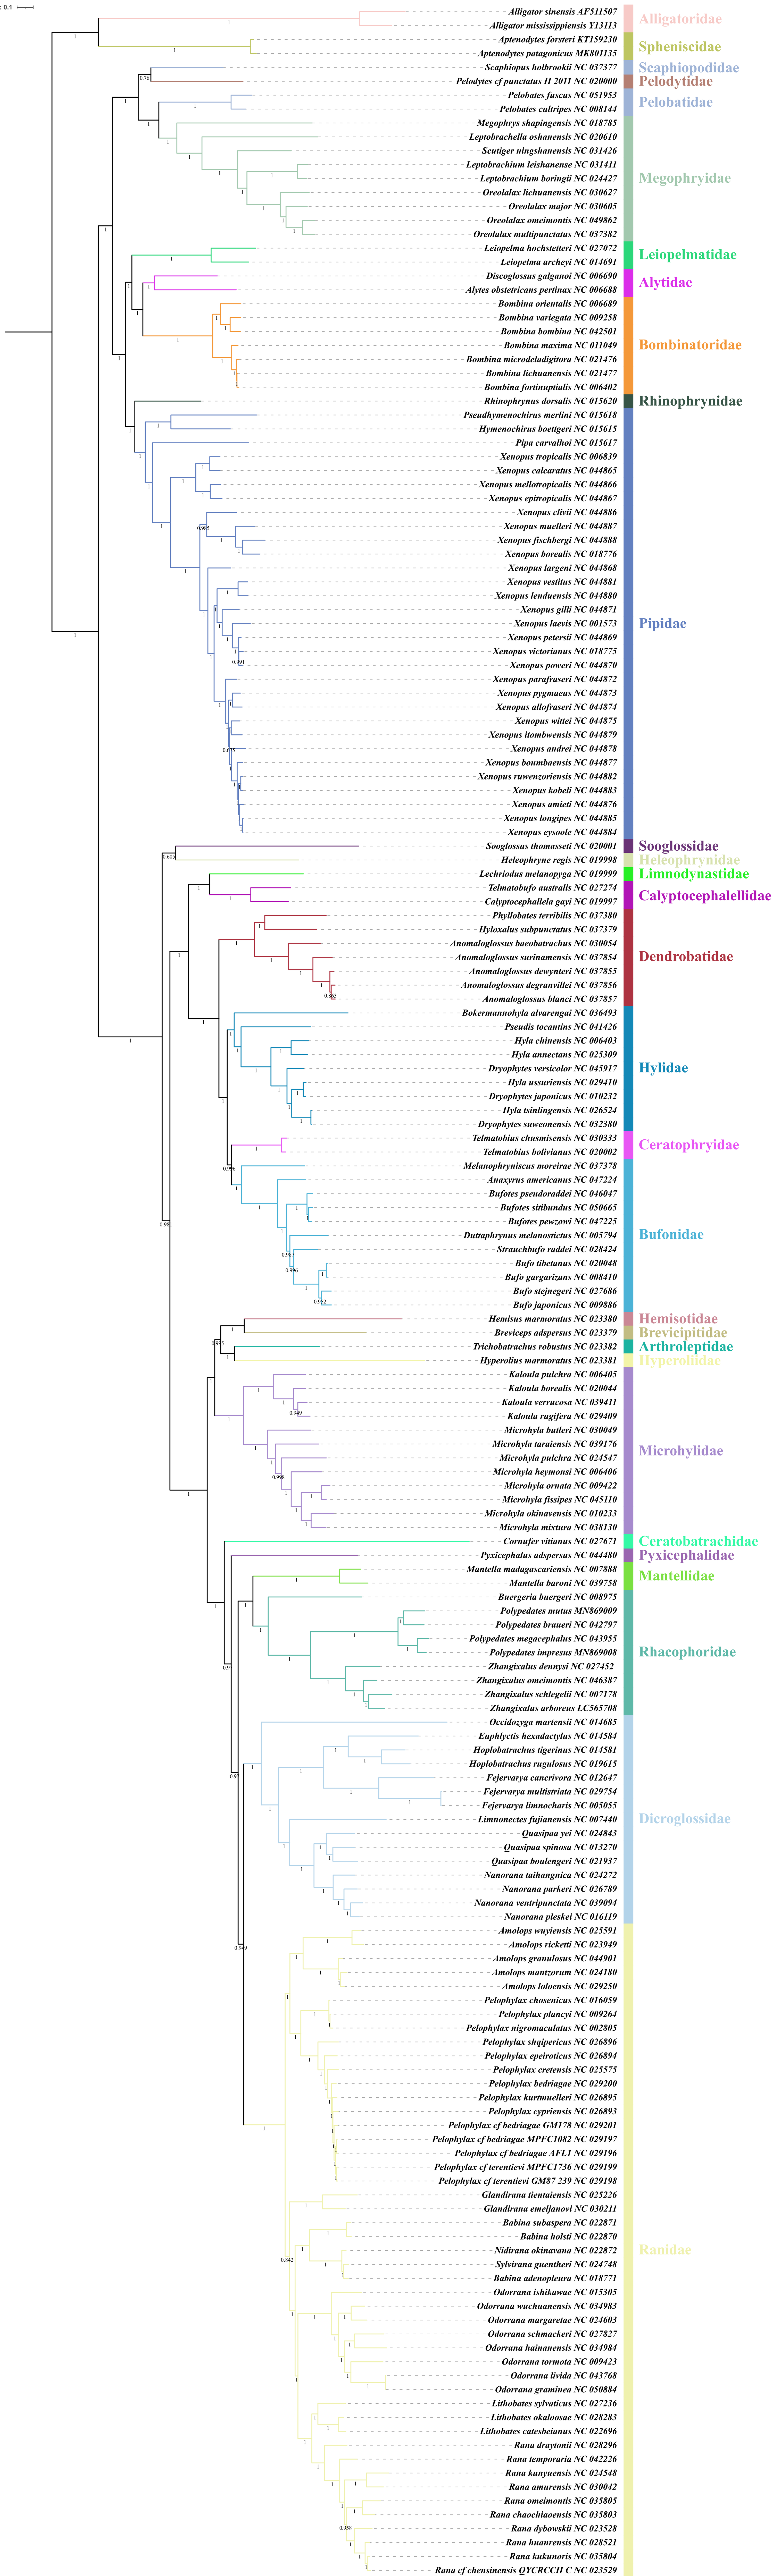

Supplement: s1 [file s1]
